# Supplementary material for: A transfer-learning approach to predict antigen immunogenicity and T-cell receptor specificity
Source: eLife journal article supplement (doi:10.7554/elife.85126), 2023-09-08
Supplement: supp [file elife_poa_e85126_Figure_2_figure_supplement_1.pdf › elife_poa_e85126_Figure_2_figure_supplement_1.pdf]

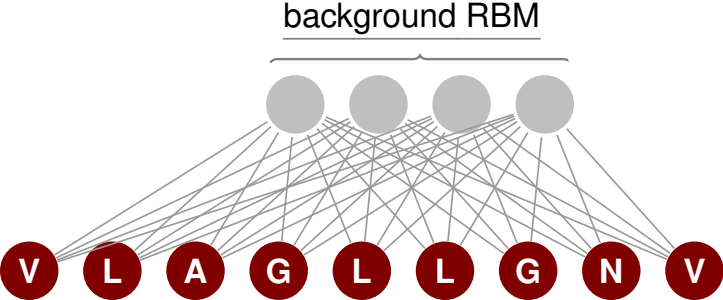

HLA-A\*02:01 presented peptides

VLAGLLGNV

GILGFVFTL

Immunogenic ✓

FLCLFLLPSL

SLQQELA HM

ALYGVWPLLL

ALAESIRPL

Non-immunogenic ✗

Data from IEDB

## Model of presentation

(RBM-MHC, Bravi et al. 2021)

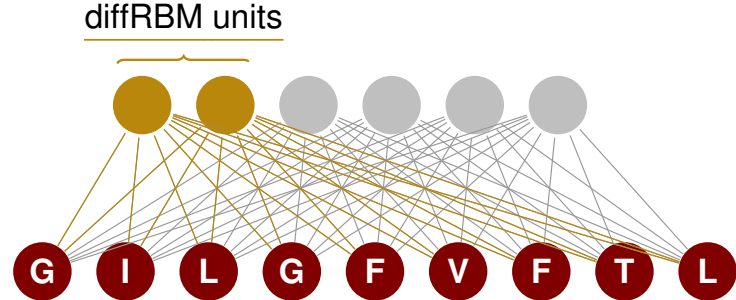

HLA-A\*02:01 immunogenic peptides

GILGFVFTL

AIMEKNIVL

SLYNTIATLY

KVDDTFYYV

NLVAMVATV

RVLEDGVNYA

Data from IEDB

## Model of immunogenicity
