# Supplementary material for: A transfer-learning approach to predict antigen immunogenicity and T-cell receptor specificity
Source: eLife journal article supplement (doi:10.7554/elife.85126), 2023-09-08

# Performance at discriminating immunogenic vs non-immunogenic

Allele HLA-A\*02:01

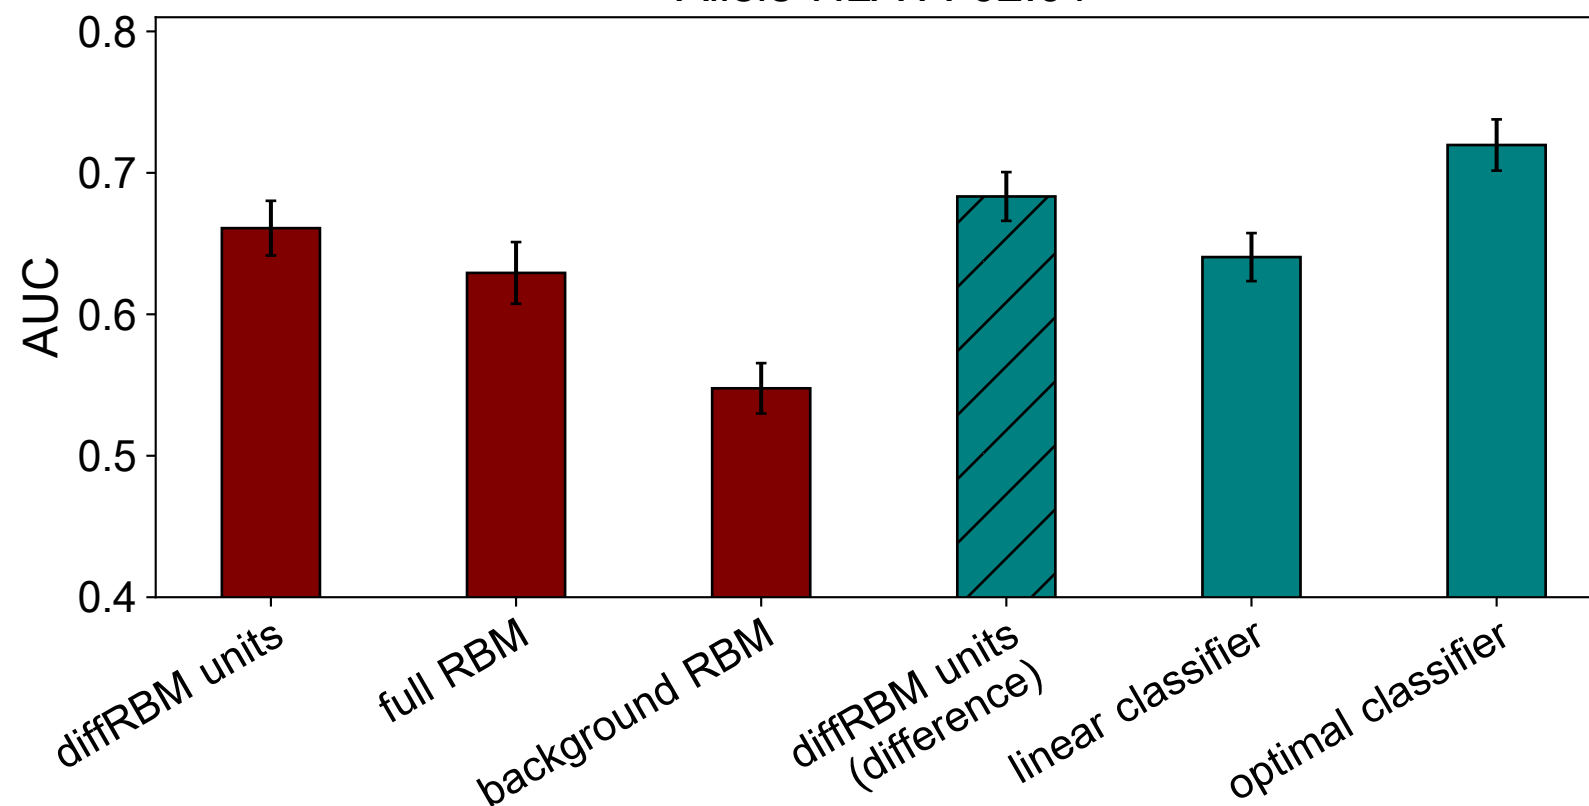

Allele HLA-B\*07:02

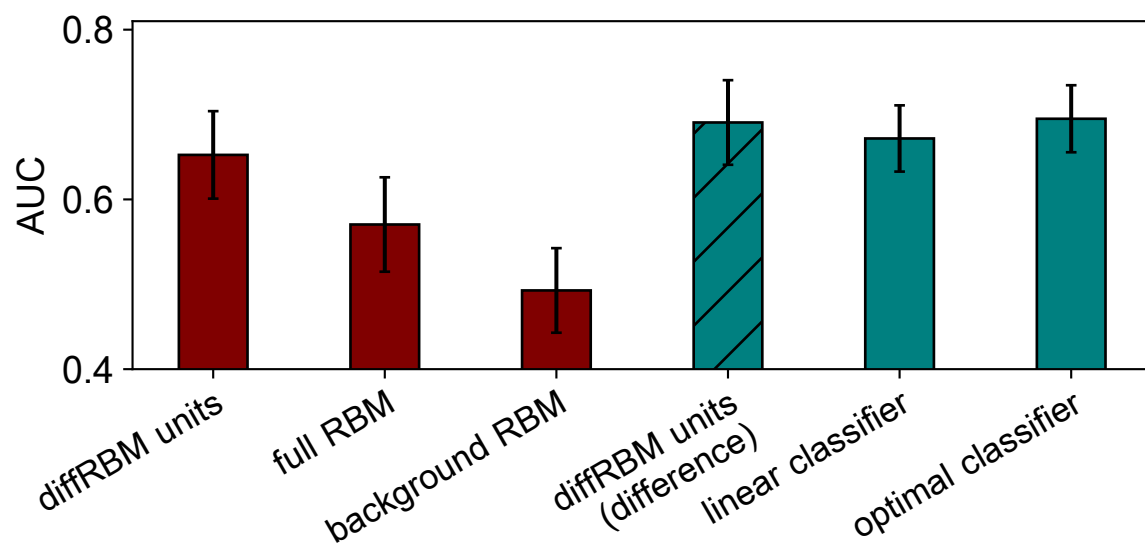

Allele HLA-B\*35:01

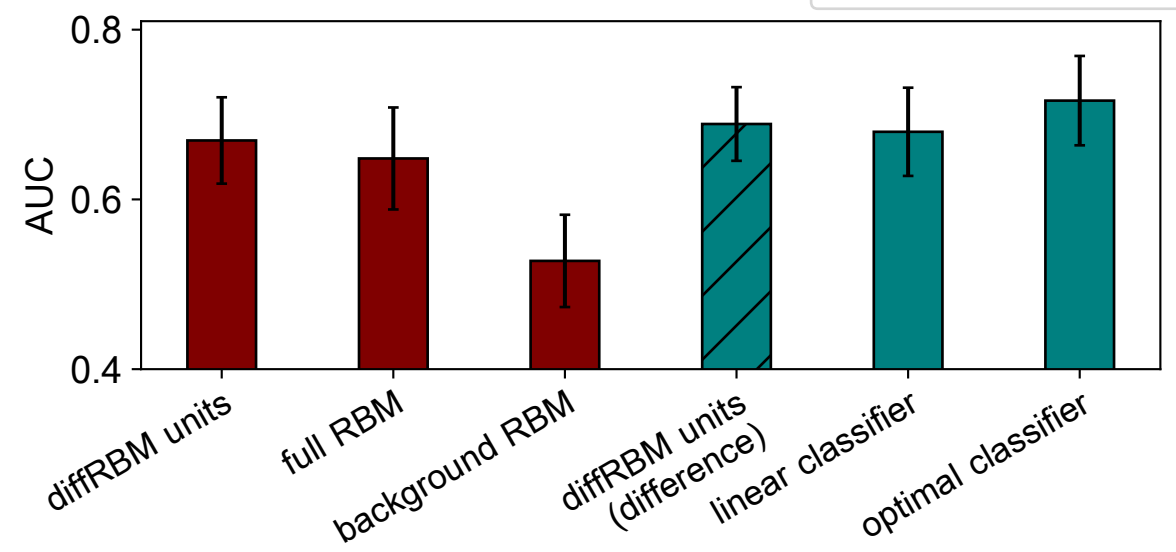

Supplement: supp [file elife_poa_e85126_Figure_4_figure_supplement_6.pdf › elife_poa_e85126_Figure_4_figure_supplement_6.pdf]
