# Supplementary material for: A transfer-learning approach to predict antigen immunogenicity and T-cell receptor specificity
Source: eLife journal article supplement (doi:10.7554/elife.85126), 2023-09-08
Supplement: supp [file elife_poa_e85126_Figure_5_figure_supplement_1.pdf › elife_poa_e85126_Figure_5_figure_supplement_1.pdf]

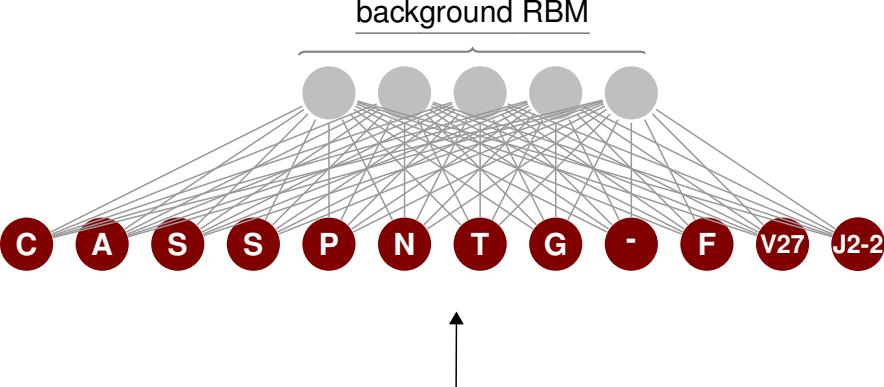

CDR3 $\beta$  sequences from bulk repertoire

CASSPNTGELFF V27 J2-2

CASSIRSSYEQYF V19 J2-7 Specific to GILGFVFTL ✓ →

CASSRDRATDTQYF V28 J2-3

CASSPRRHGDTEAFF V14 J1-1

CASKQGSSYEQYF V6-6 J2-7

CASSPWDGNTEAFF V18 J1-1

Data from Emerson et al. 2017

**Model of bulk repertoire**

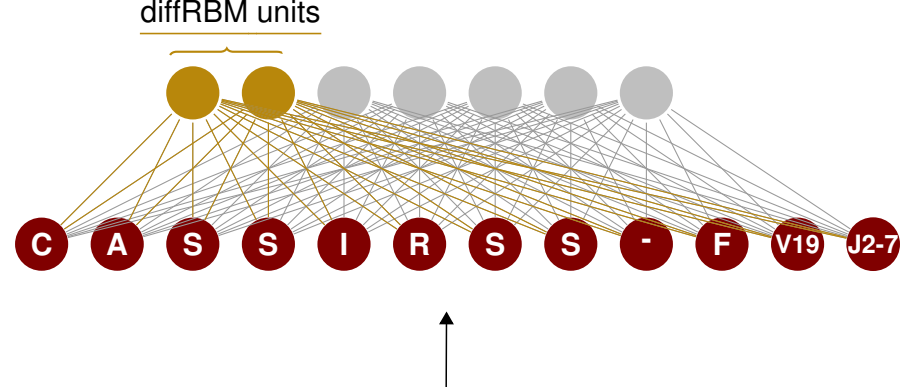

CDR3 $\beta$  of TCRs specific to epitope GILGFVFTL

CASSIRSSYEQYF V19 J2-7

CASSQMTGLNTEAFF V28 J1-1

CASSRSAGELFF V19 J2-2

CASSGGRNQPHF V5-4 J1-5

CASSVRSSYEQYF V19 J2-7

CASSRSAYEQYF V19 J2-7

Data from VDJdb

**Model of epitope specificity**
