# Supplementary figures and images for: A transfer-learning approach to predict antigen immunogenicity and T-cell receptor specificity
Source: eLife journal article supplement (doi:10.7554/elife.85126), 2023-09-08

# diffRBM architecture

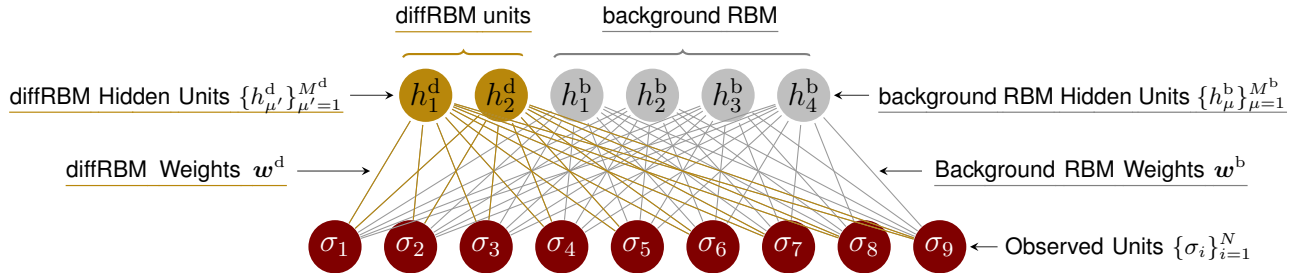

Supplement: supp [file elife_poa_e85126_Figure_1_figure_supplement_1.pdf › elife_poa_e85126_Figure_1_figure_supplement_1.pdf]

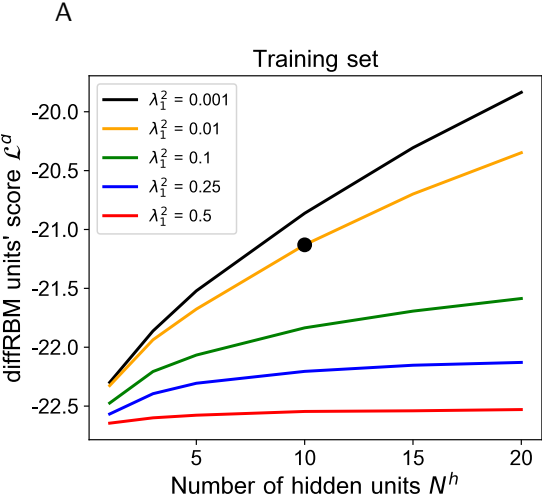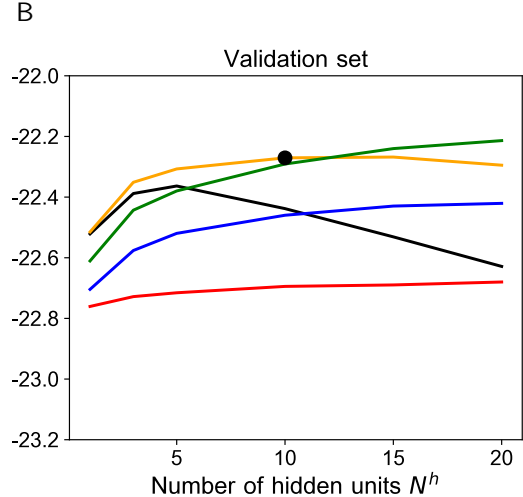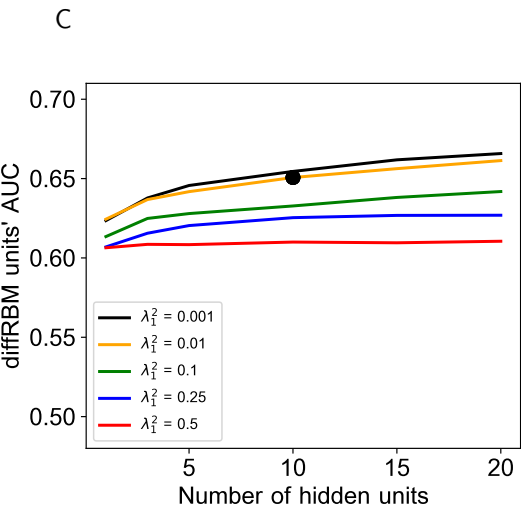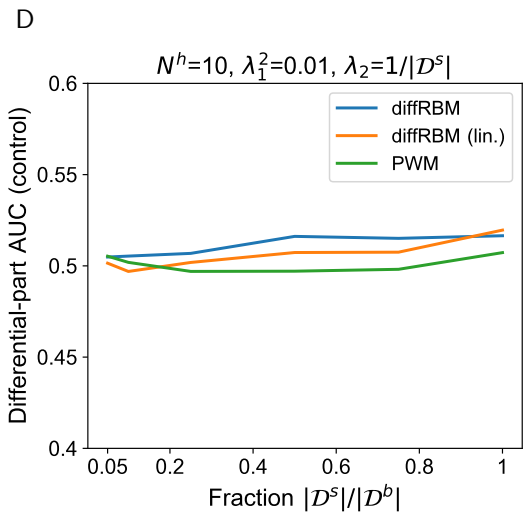

Supplement: supp [file elife_poa_e85126_Figure_2_figure_supplement_2.pdf › elife_poa_e85126_Figure_2_figure_supplement_2.pdf]

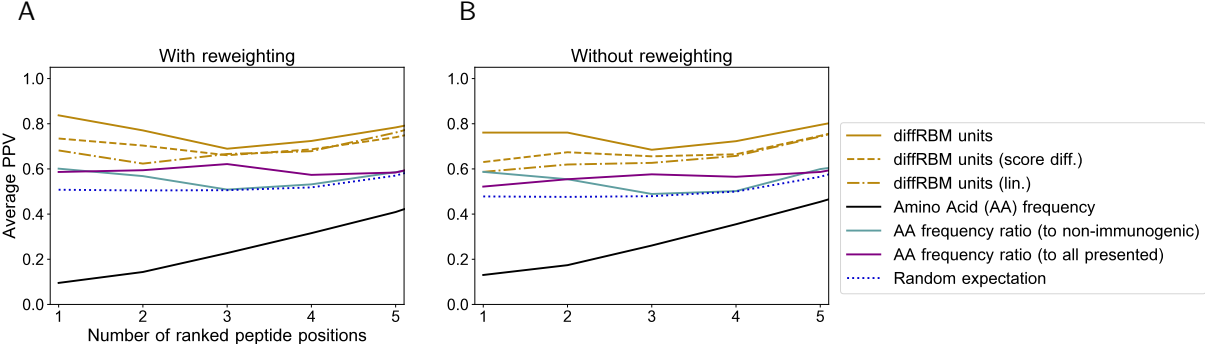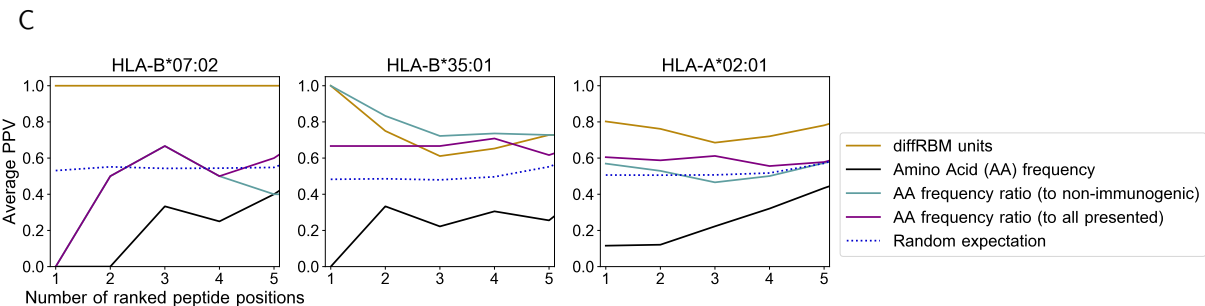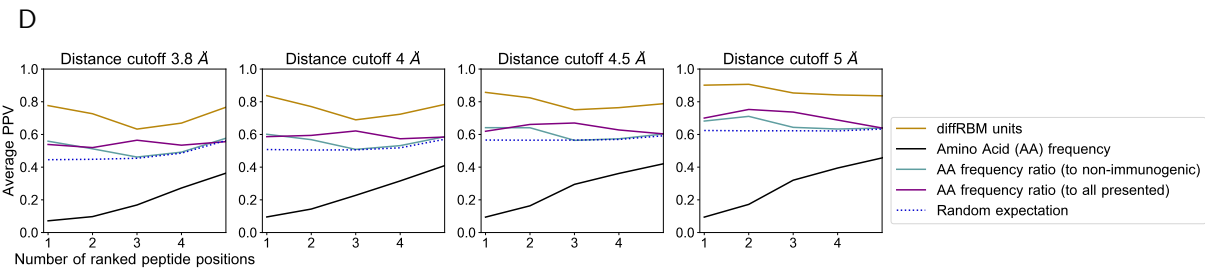

Supplement: supp [file elife_poa_e85126_Figure_2_figure_supplement_3.pdf › elife_poa_e85126_Figure_2_figure_supplement_3.pdf]

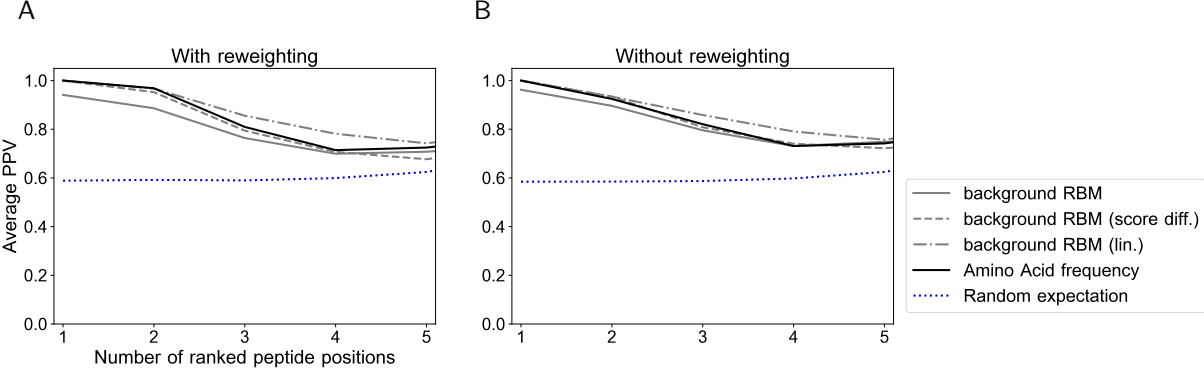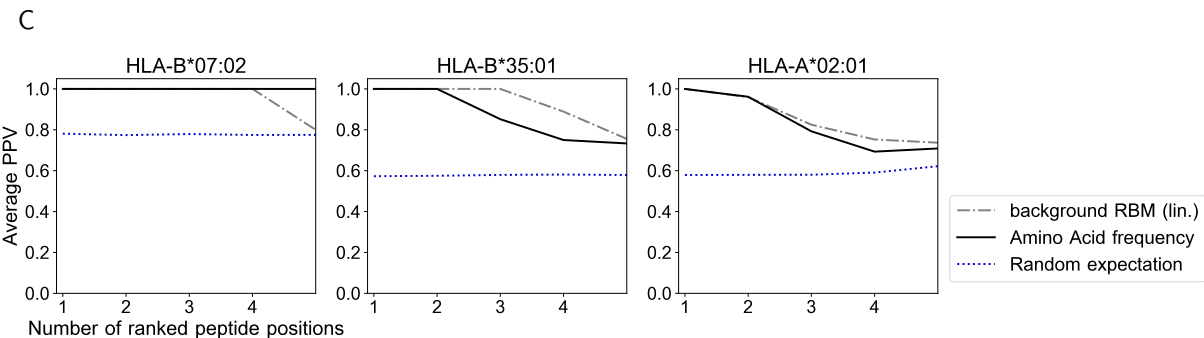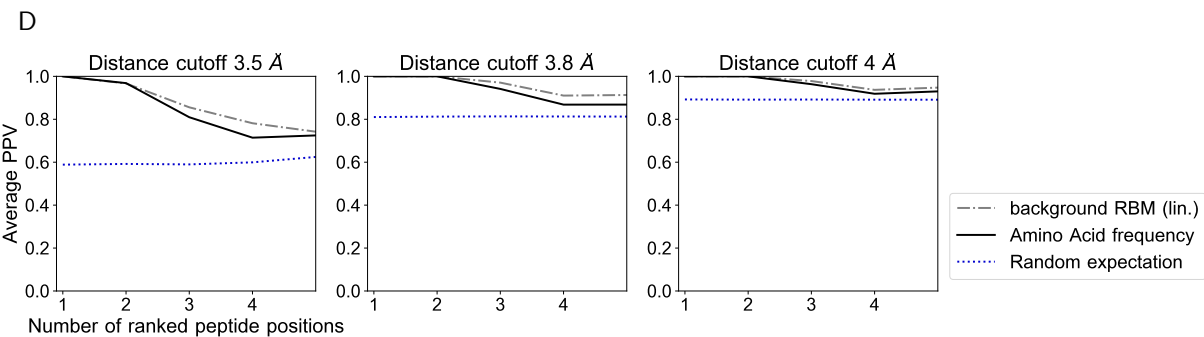

Supplement: supp [file elife_poa_e85126_Figure_2_figure_supplement_4.pdf › elife_poa_e85126_Figure_2_figure_supplement_4.pdf]

A

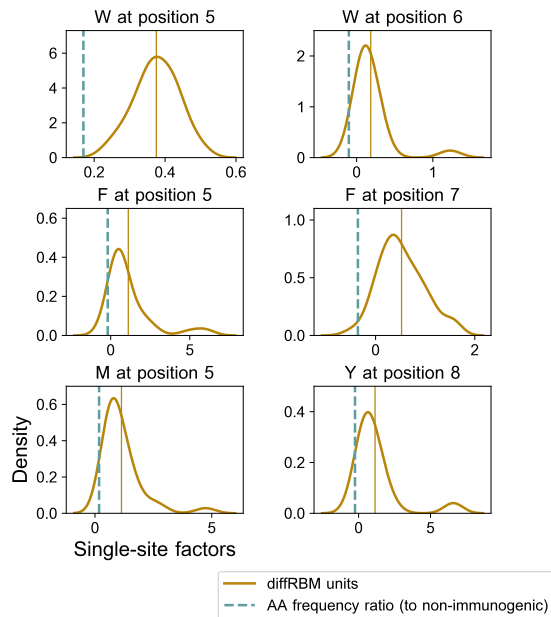

B

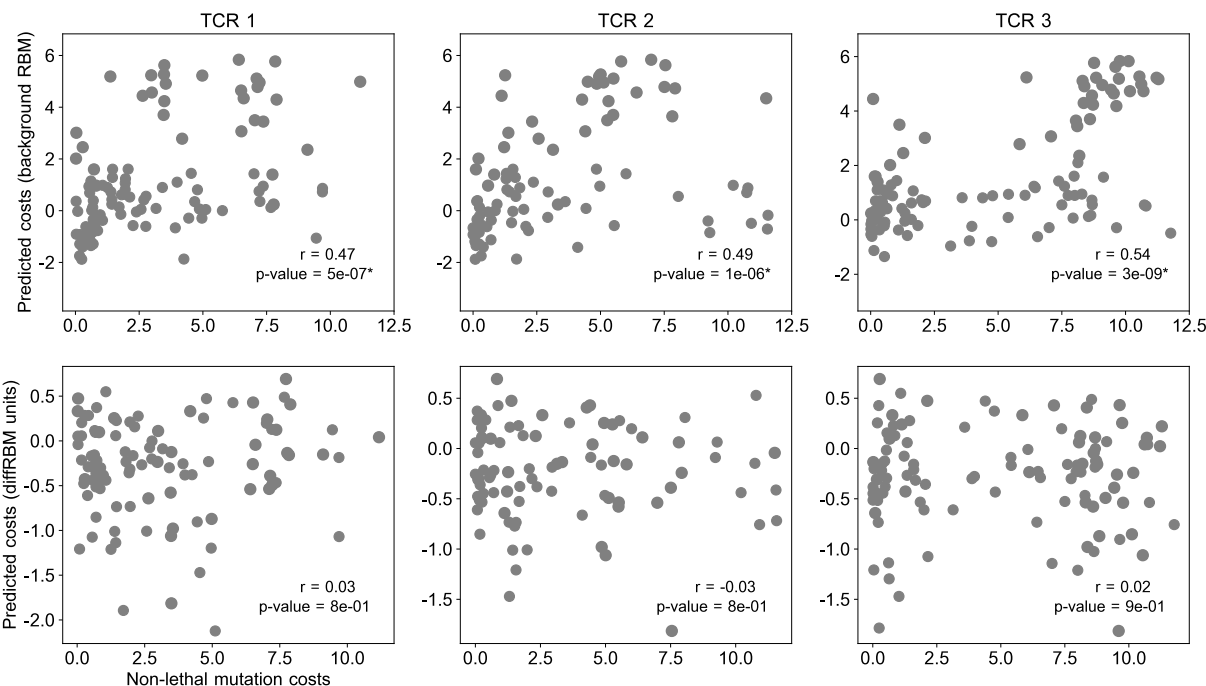

Supplement: supp [file elife_poa_e85126_Figure_3_figure_supplement_1.pdf › elife_poa_e85126_Figure_3_figure_supplement_1.pdf]

# Performance at discriminating immunogenic vs non-immunogenic

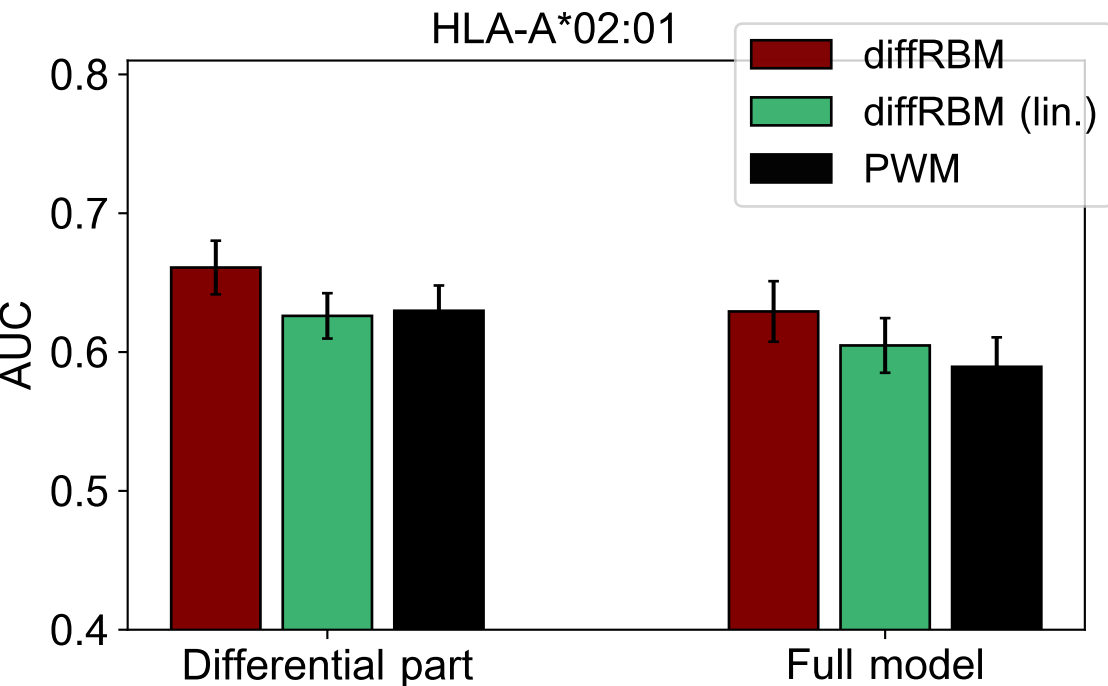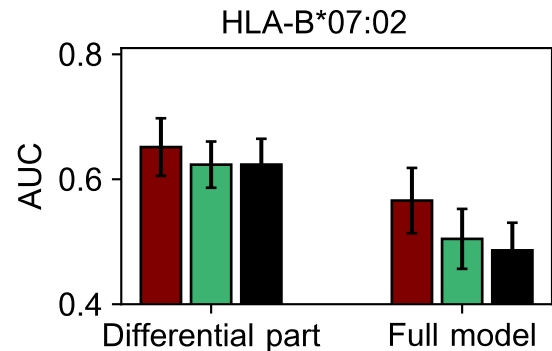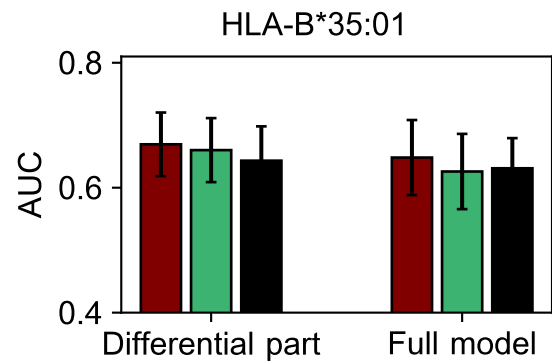

Supplement: supp [file elife_poa_e85126_Figure_4_figure_supplement_1.pdf › elife_poa_e85126_Figure_4_figure_supplement_1.pdf]

A

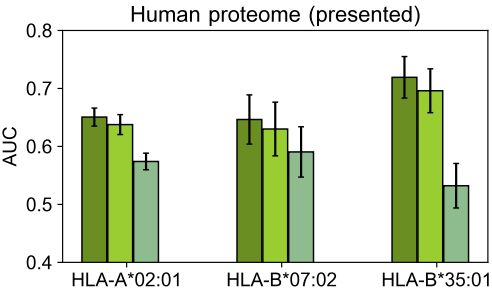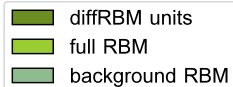

B

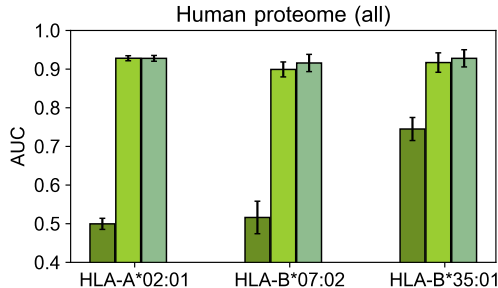

Supplement: supp [file elife_poa_e85126_Figure_4_figure_supplement_2.pdf › elife_poa_e85126_Figure_4_figure_supplement_2.pdf]

Leave-one-organism-out (HLA-A\*02:01 model)

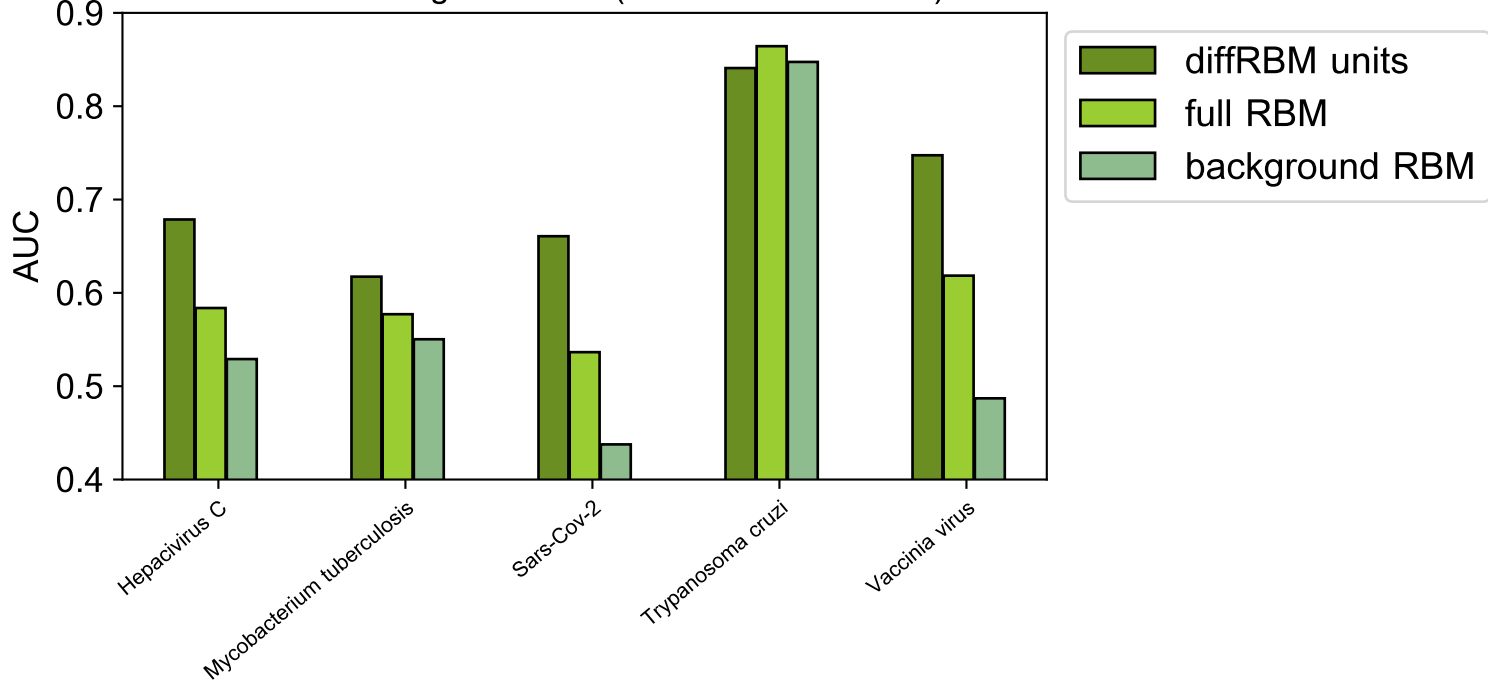

Supplement: supp [file elife_poa_e85126_Figure_4_figure_supplement_3.pdf › elife_poa_e85126_Figure_4_figure_supplement_3.pdf]

Performance at discriminating immunogenic vs non-immunogenic

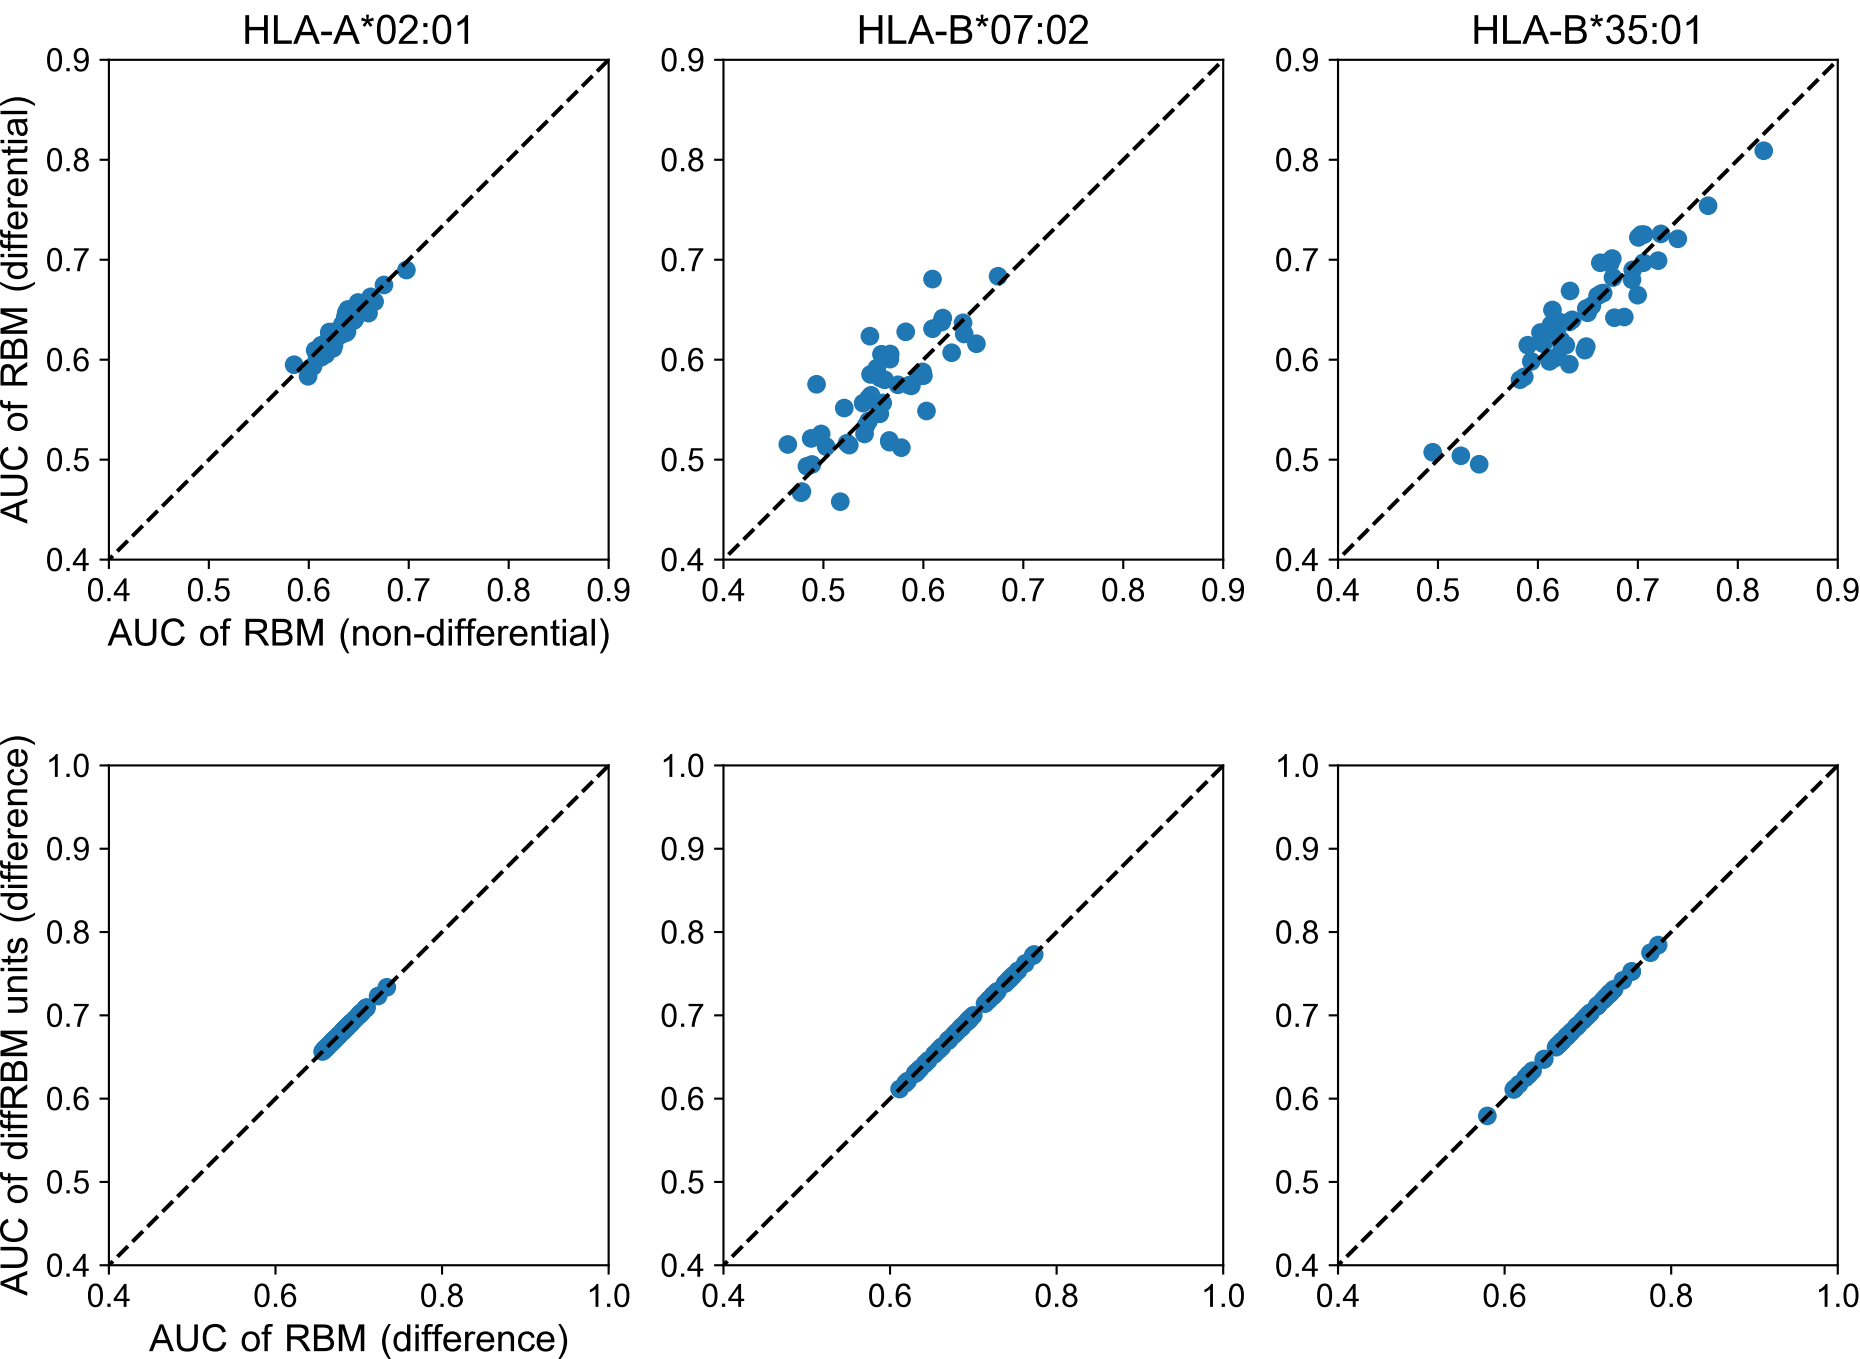

Supplement: supp [file elife_poa_e85126_Figure_4_figure_supplement_4.pdf › elife_poa_e85126_Figure_4_figure_supplement_4.pdf]

A

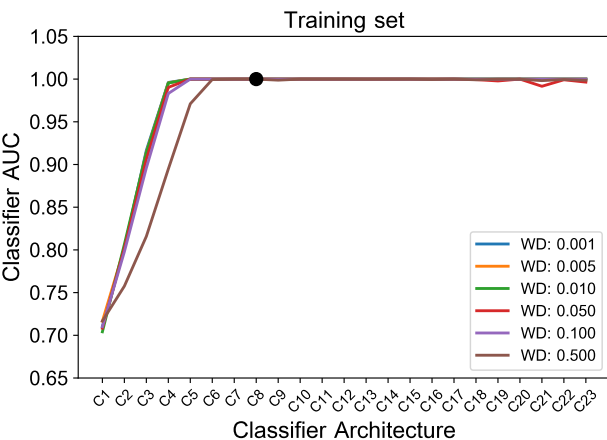

B

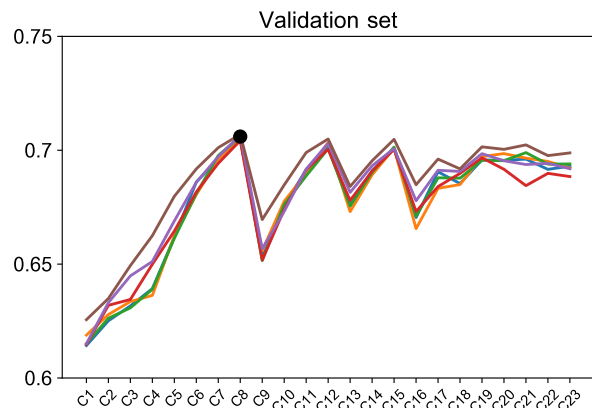

C

| Id. | Depth | Input | Intermediate widths | Output |
|-----|-------|-------|---------------------|--------|
| C1  | 2     | 180   | -                   | 1      |
| C2  | 3     | 180   | 2                   | 1      |
| C3  | 3     | 180   | 4                   | 1      |
| C4  | 3     | 180   | 8                   | 1      |
| C5  | 3     | 180   | 16                  | 1      |
| C6  | 3     | 180   | 32                  | 1      |
| C7  | 3     | 180   | 64                  | 1      |
| C8  | 3     | 180   | 128                 | 1      |
| C9  | 4     | 180   | 16, 8               | 1      |
| C10 | 4     | 180   | 32, 8               | 1      |
| C11 | 4     | 180   | 64, 8               | 1      |
| C12 | 4     | 180   | 128, 8              | 1      |
| C13 | 4     | 180   | 32, 16              | 1      |
| C14 | 4     | 180   | 64, 16              | 1      |
| C15 | 4     | 180   | 128, 16             | 1      |
| C16 | 5     | 180   | 32, 16, 8           | 1      |
| C17 | 5     | 180   | 64, 16, 8           | 1      |
| C18 | 5     | 180   | 64, 32, 16          | 1      |
| C19 | 5     | 180   | 128, 32, 16         | 1      |
| C20 | 5     | 180   | 128, 64, 16         | 1      |
| C21 | 5     | 180   | 128, 64, 32         | 1      |
| C22 | 6     | 180   | 128, 64, 32, 8      | 1      |
| C23 | 6     | 180   | 128, 64, 32, 16     | 1      |

Supplement: supp [file elife_poa_e85126_Figure_4_figure_supplement_5.pdf › elife_poa_e85126_Figure_4_figure_supplement_5.pdf]

A

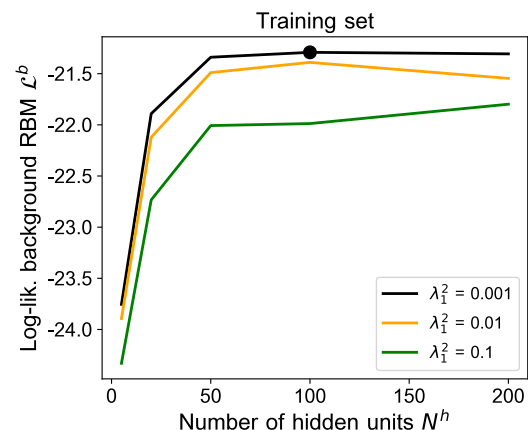

B

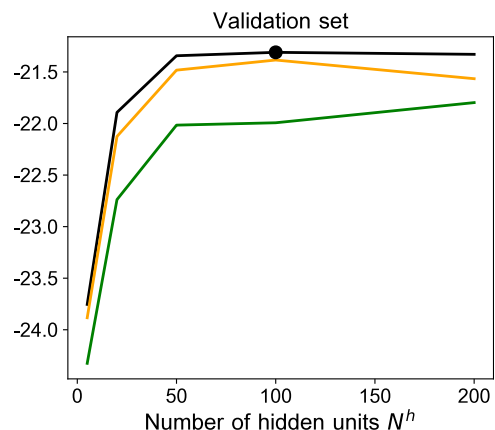

C

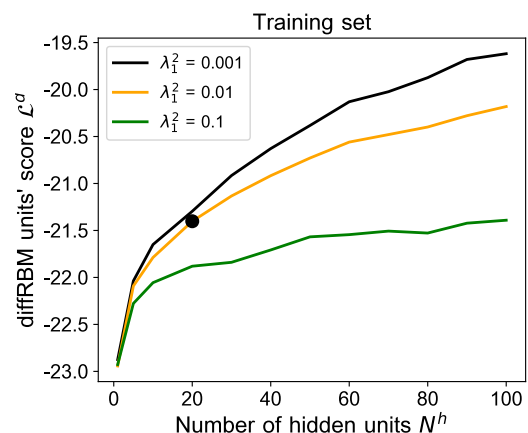

D

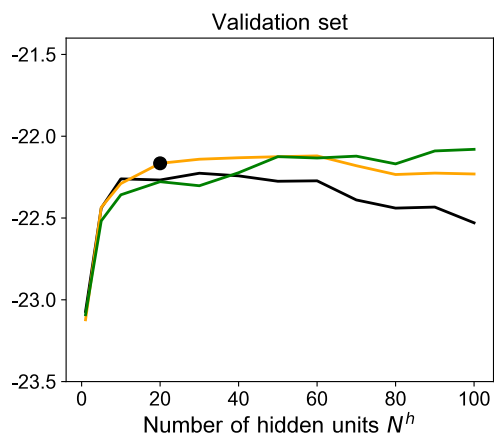

E

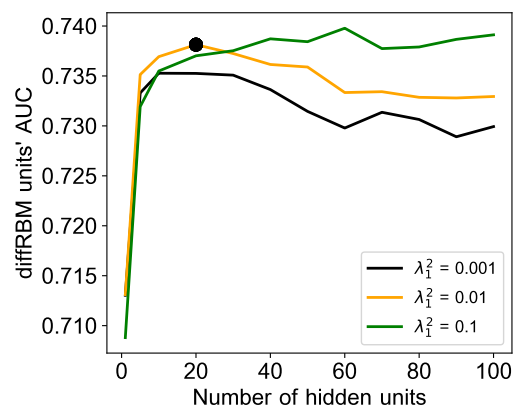

F

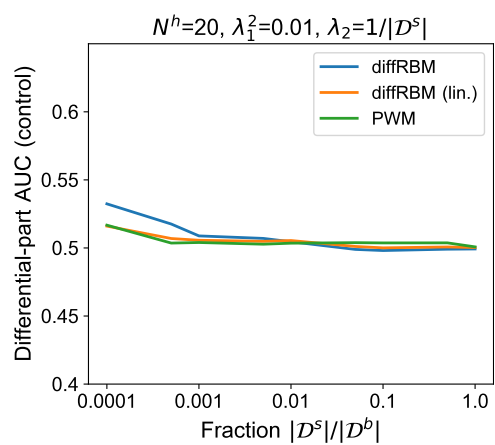

Supplement: supp [file elife_poa_e85126_Figure_5_figure_supplement_2.pdf › elife_poa_e85126_Figure_5_figure_supplement_2.pdf]

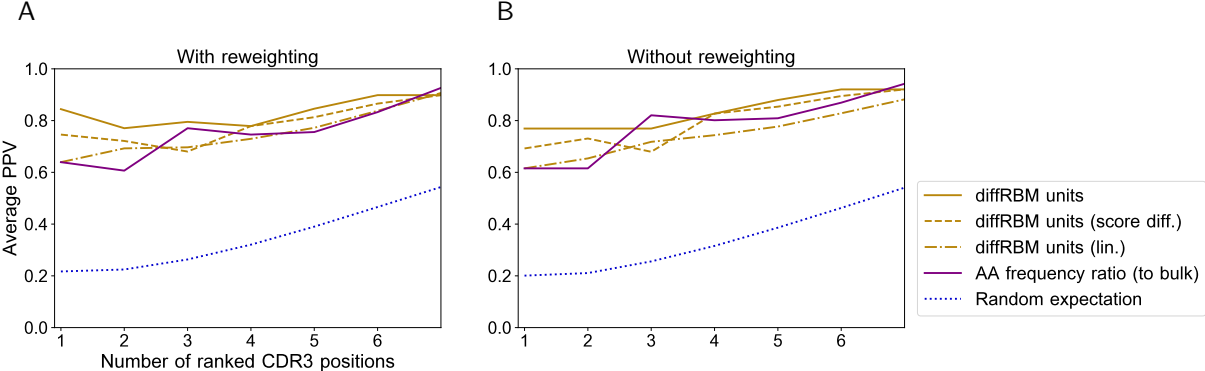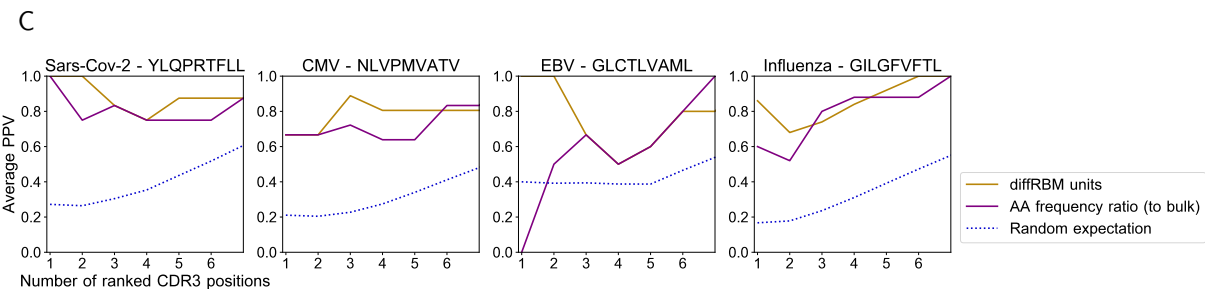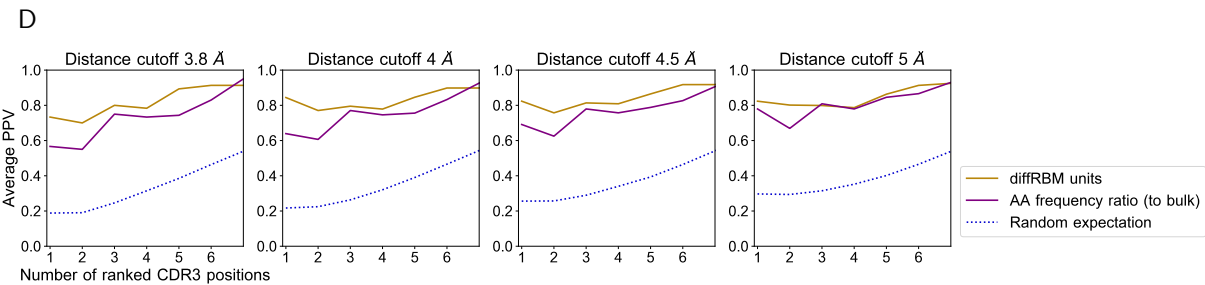

Supplement: supp [file elife_poa_e85126_Figure_5_figure_supplement_3.pdf › elife_poa_e85126_Figure_5_figure_supplement_3.pdf]

# Performance at discriminating specific vs bulk CDR3 $\beta$

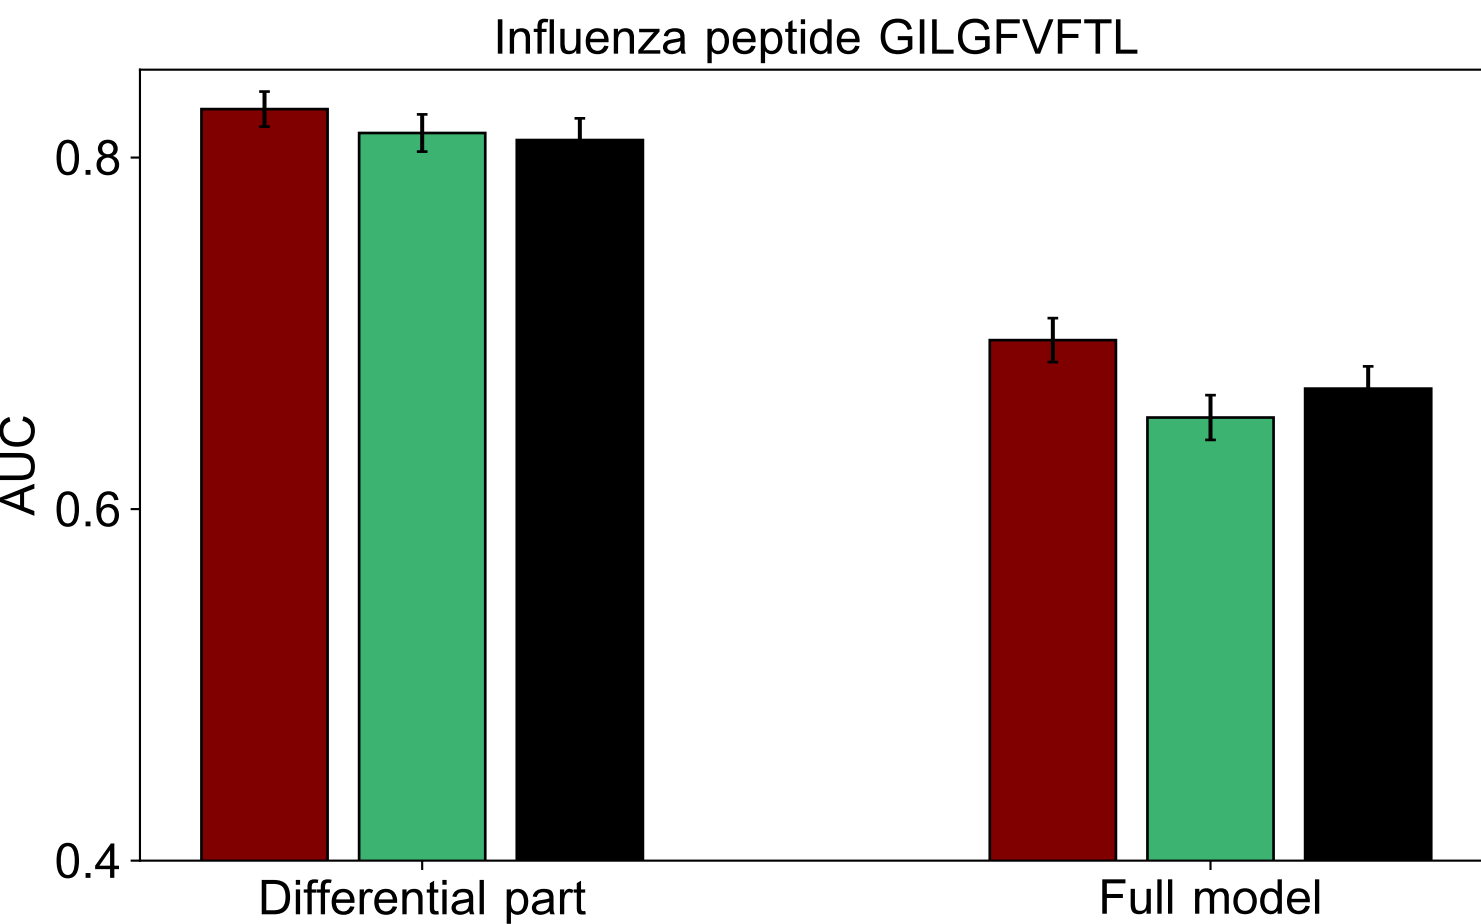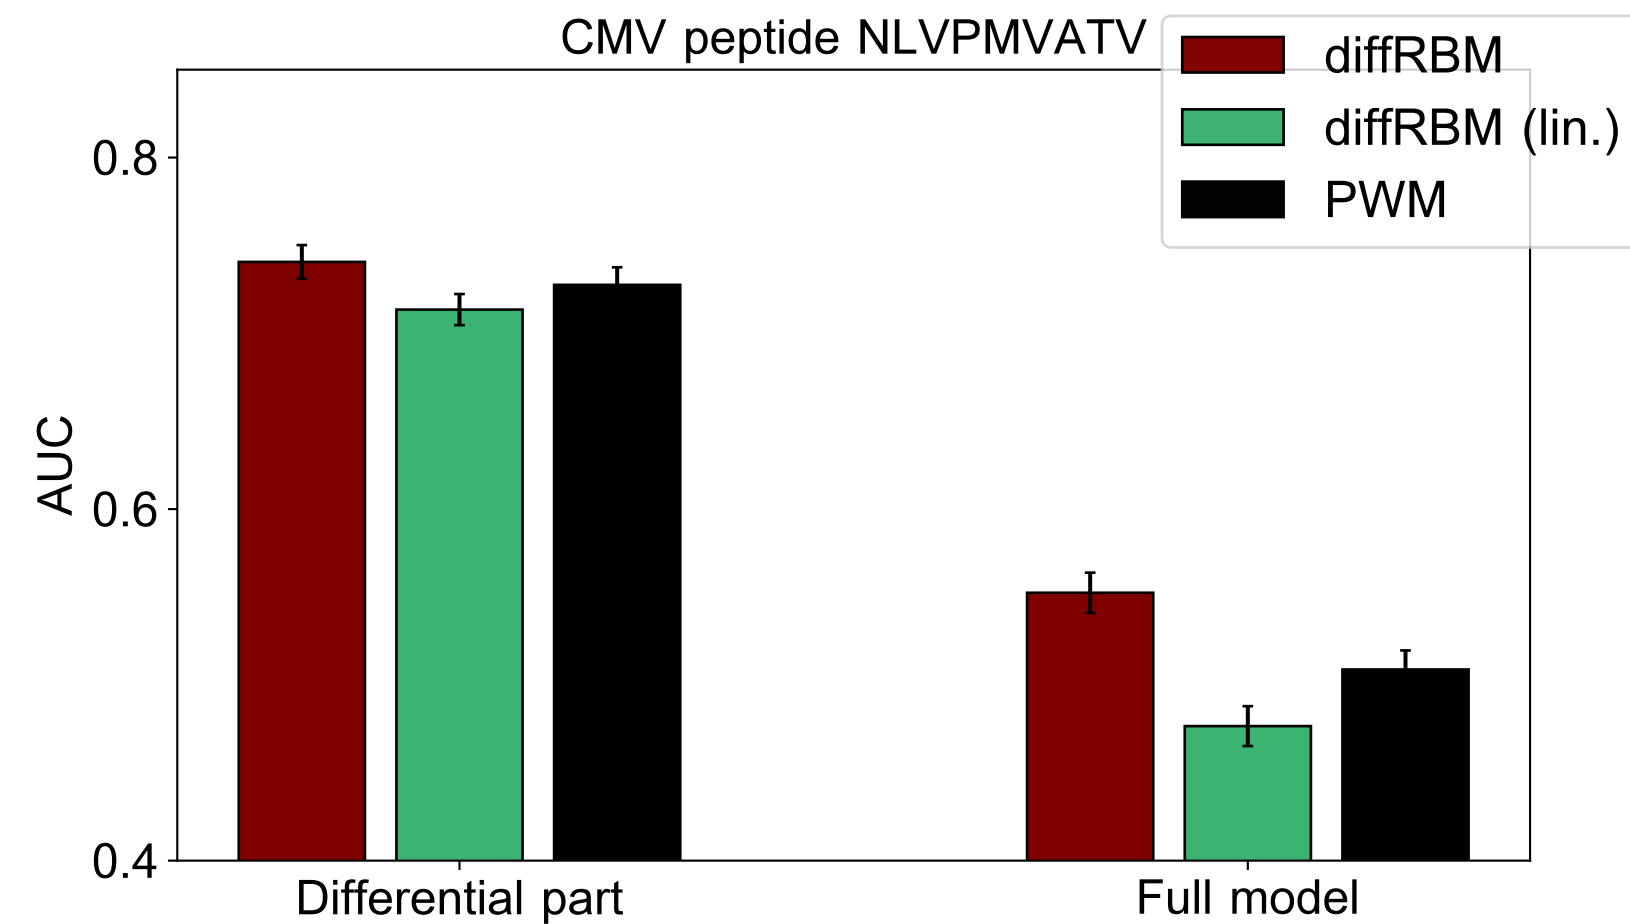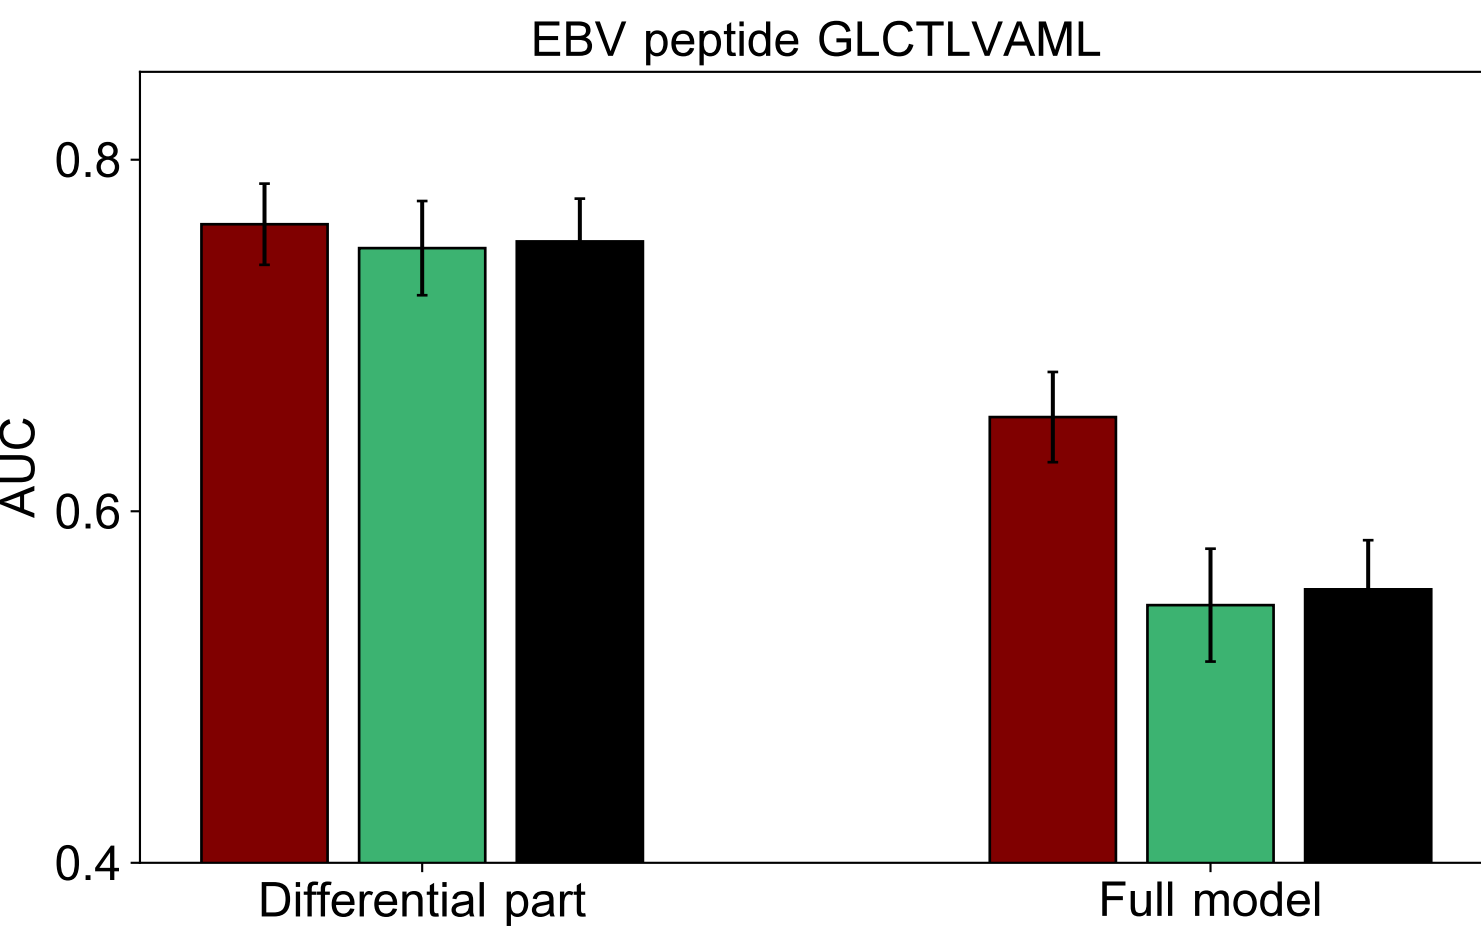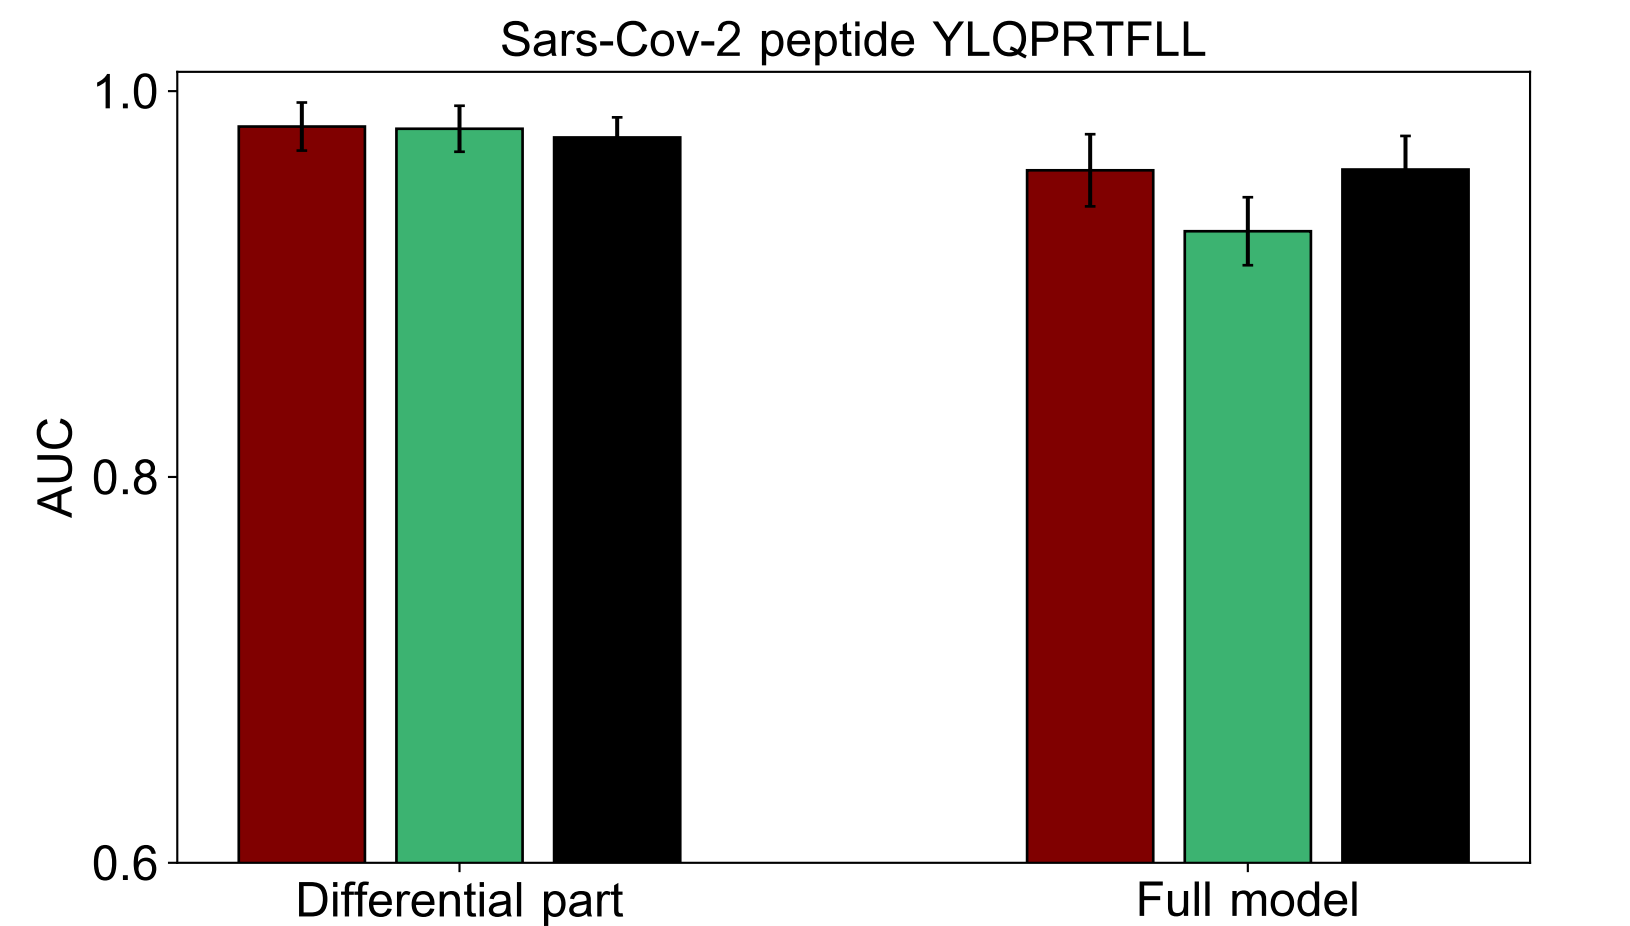

Supplement: supp [file elife_poa_e85126_Figure_6_figure_supplement_1.pdf › elife_poa_e85126_Figure_6_figure_supplement_1.pdf]

# Performance at discriminating specific vs bulk CDR3 $\beta$ (different background datasets)

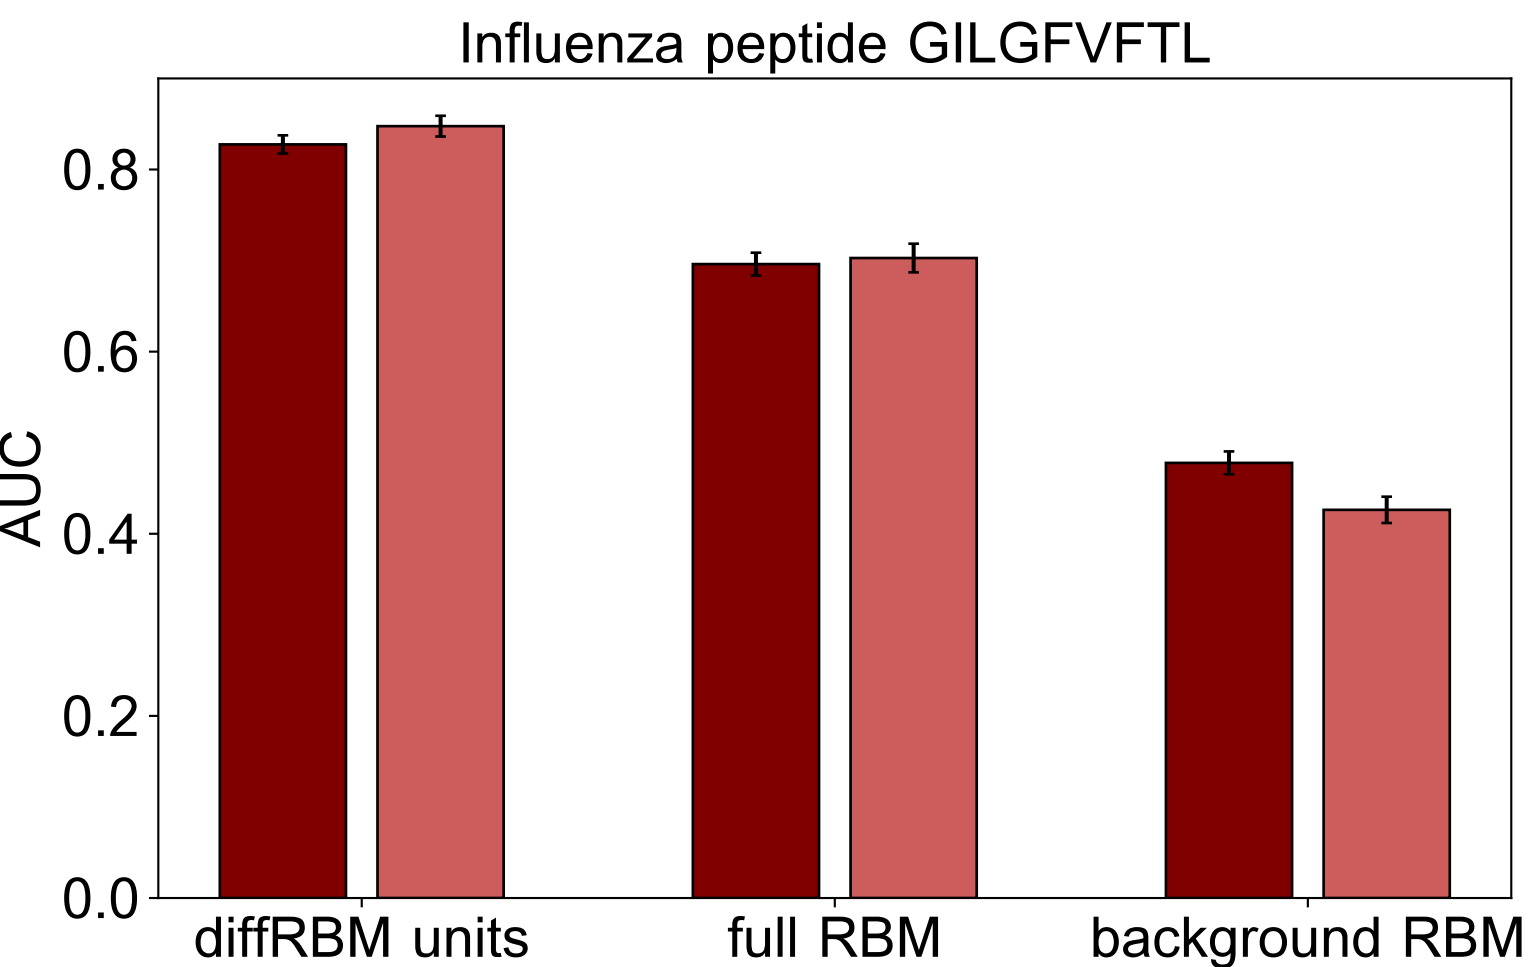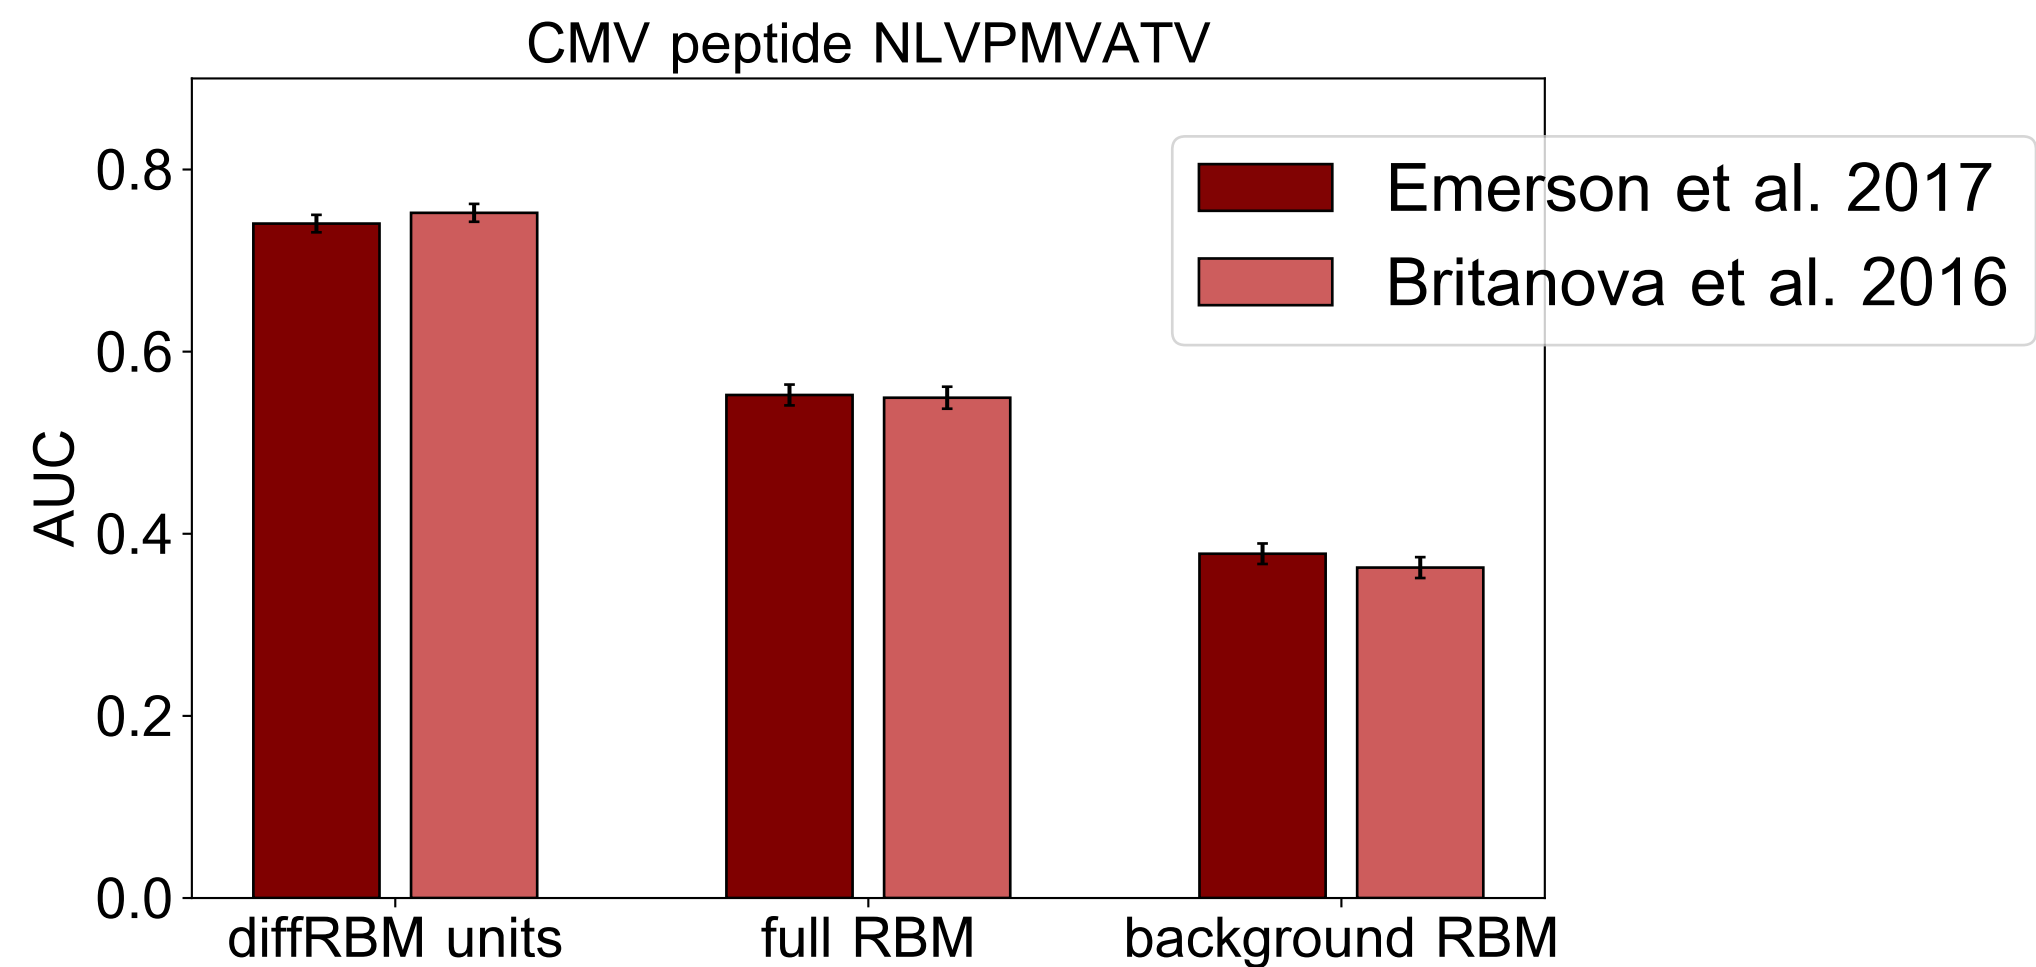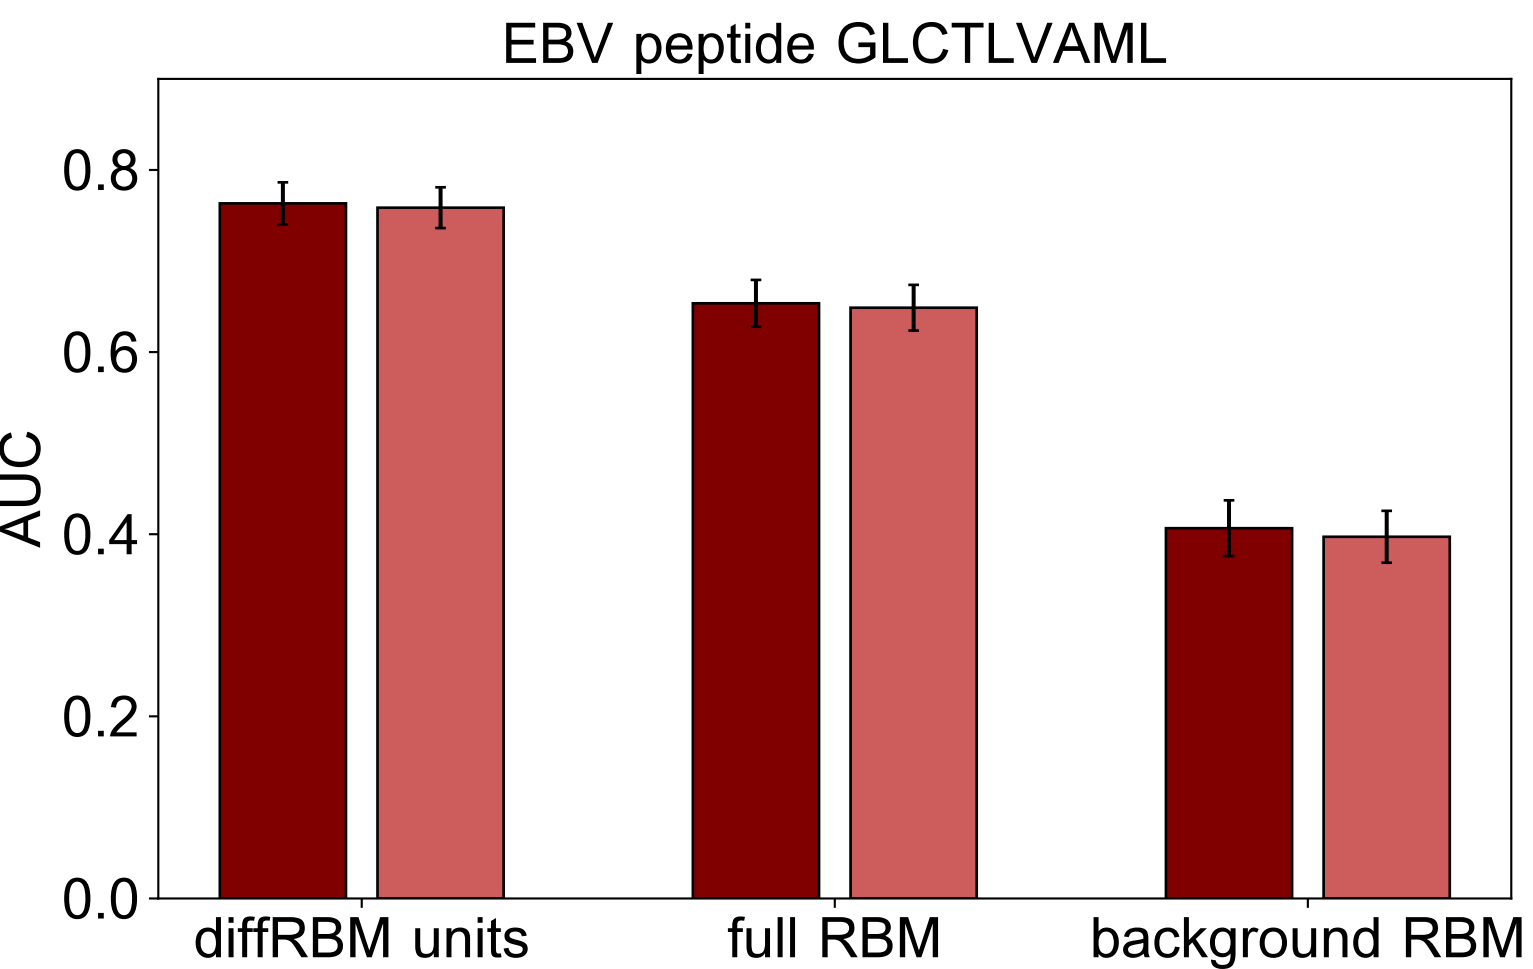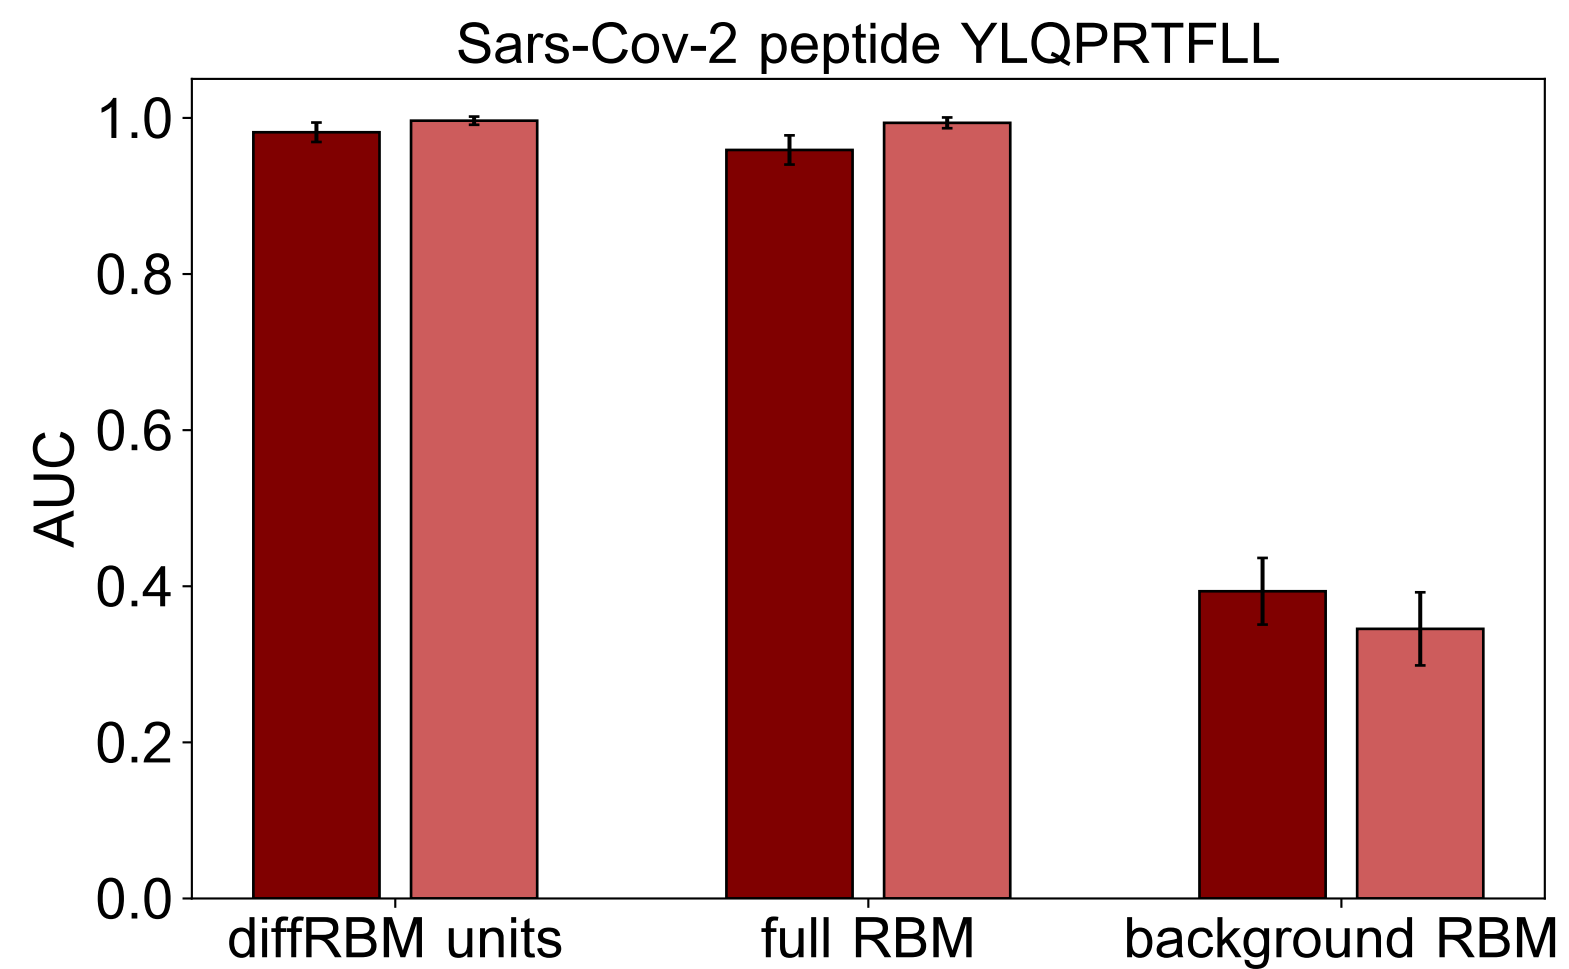

Supplement: supp [file elife_poa_e85126_Figure_6_figure_supplement_2.pdf › elife_poa_e85126_Figure_6_figure_supplement_2.pdf]

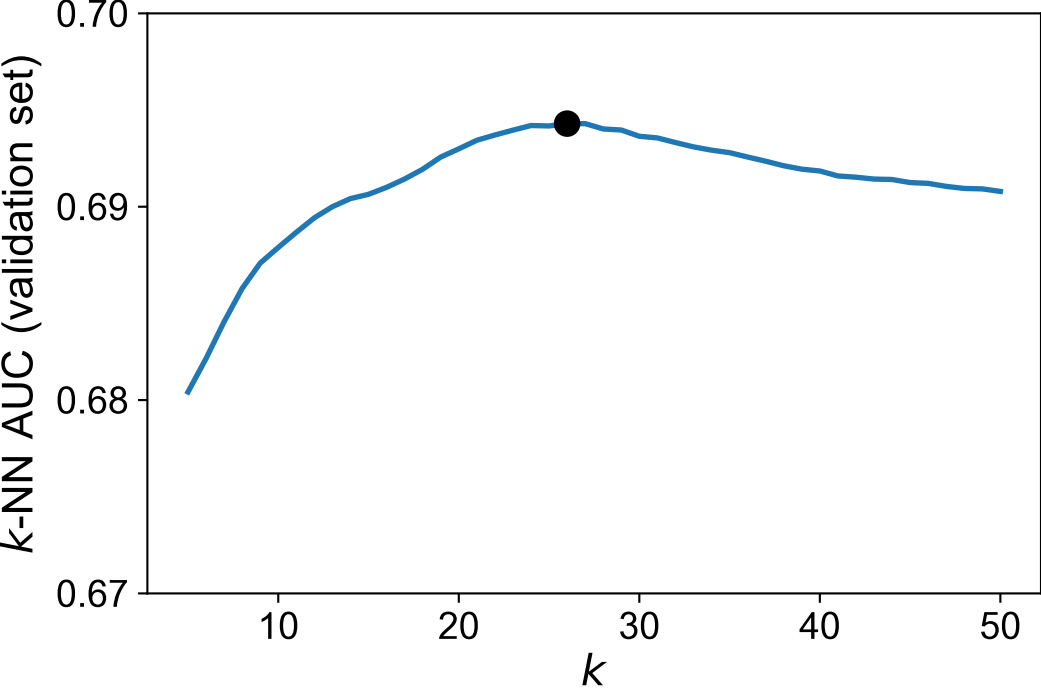

Supplement: supp [file elife_poa_e85126_Figure_6_figure_supplement_3.pdf › elife_poa_e85126_Figure_6_figure_supplement_3.pdf]

# Performance at discriminating specific vs bulk CDR3 $\beta$ (amino acid only)

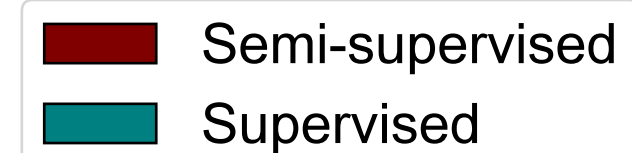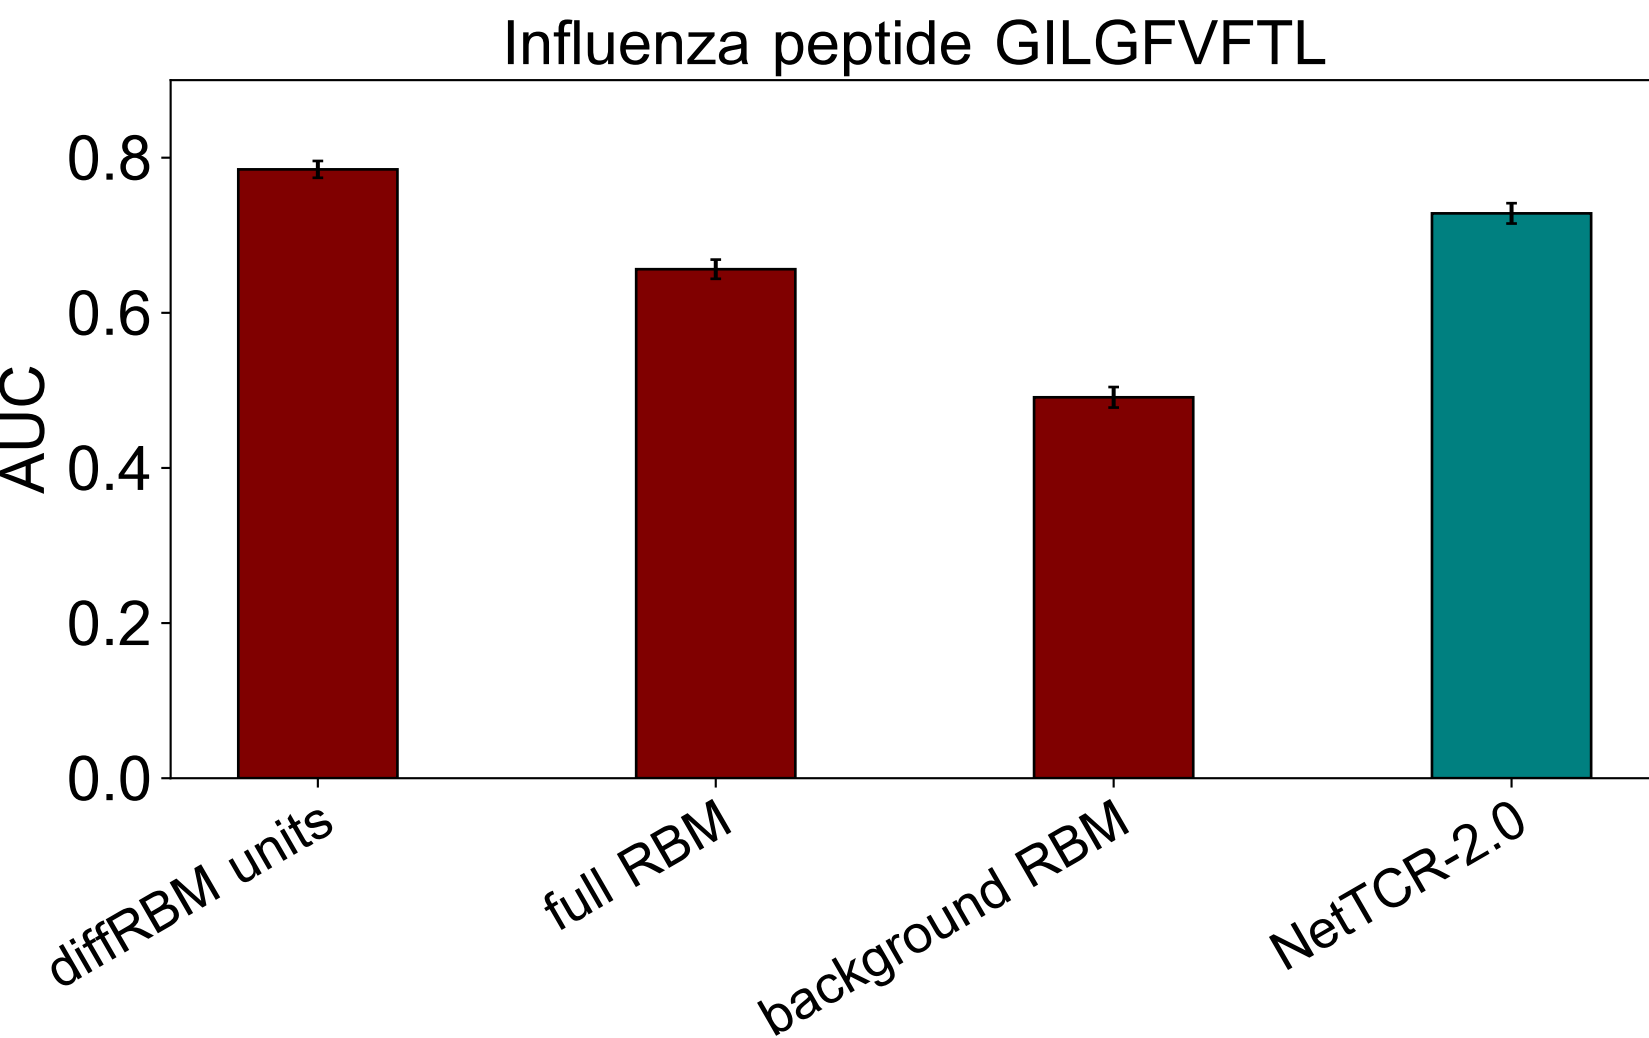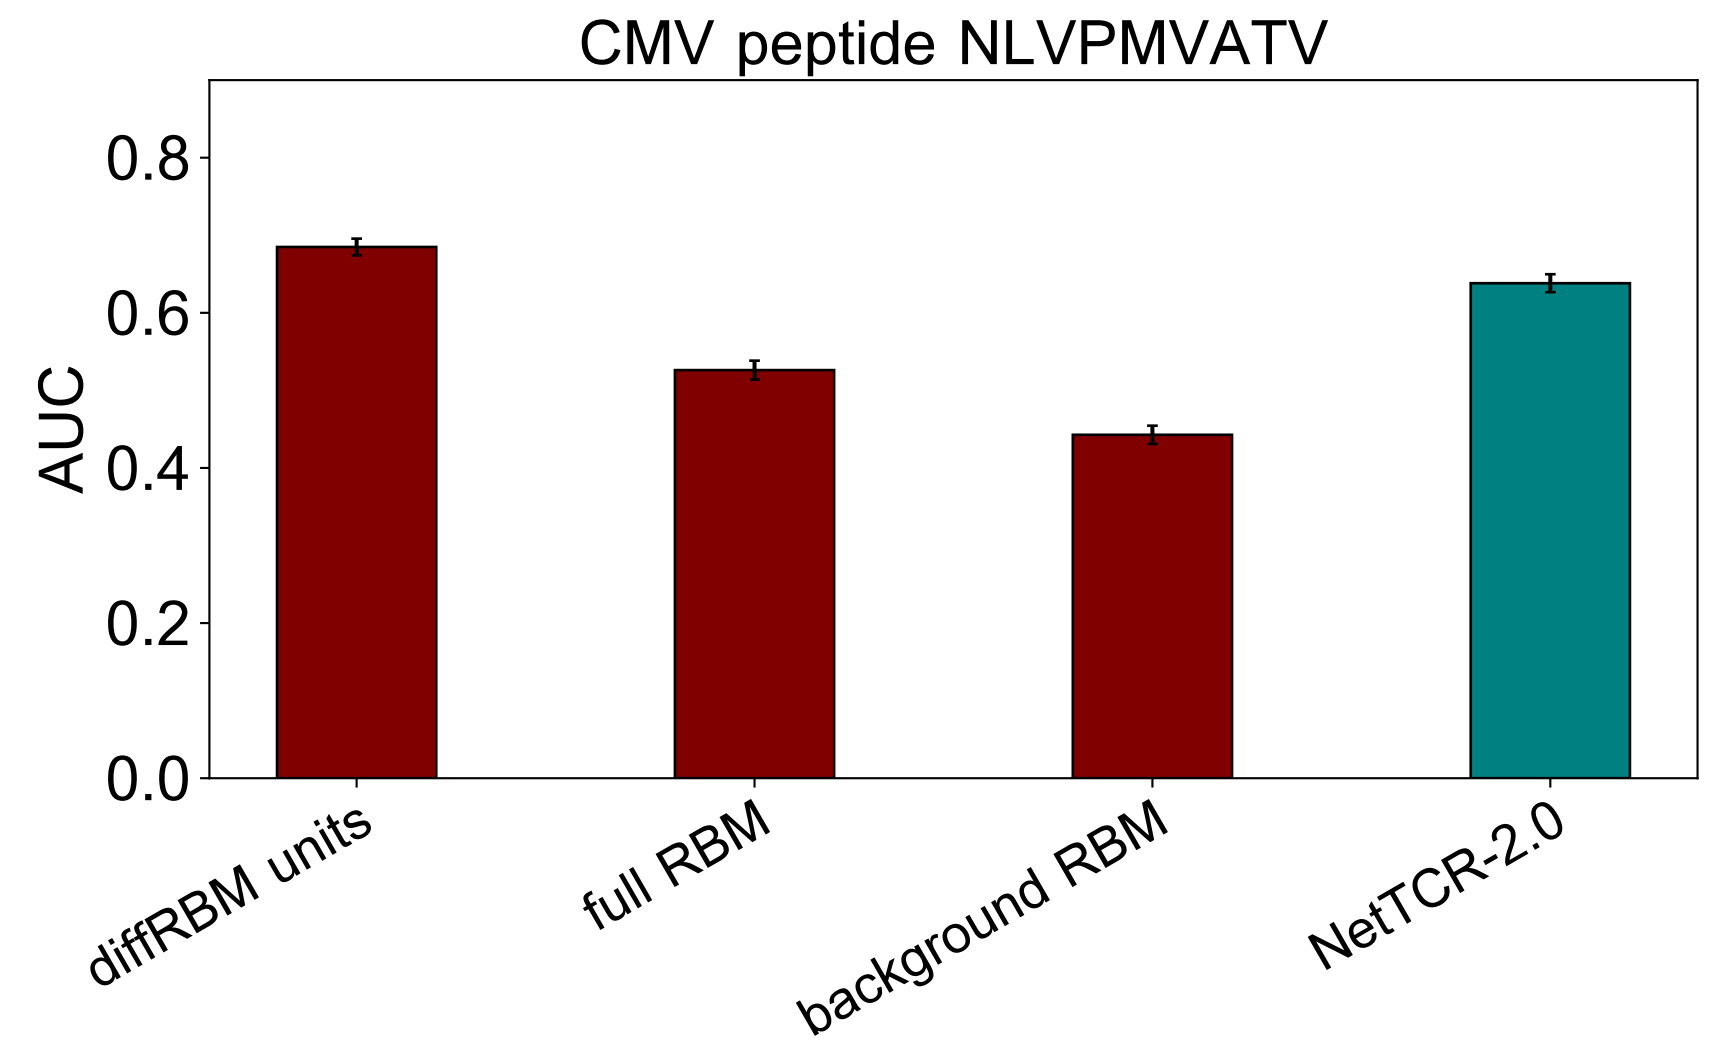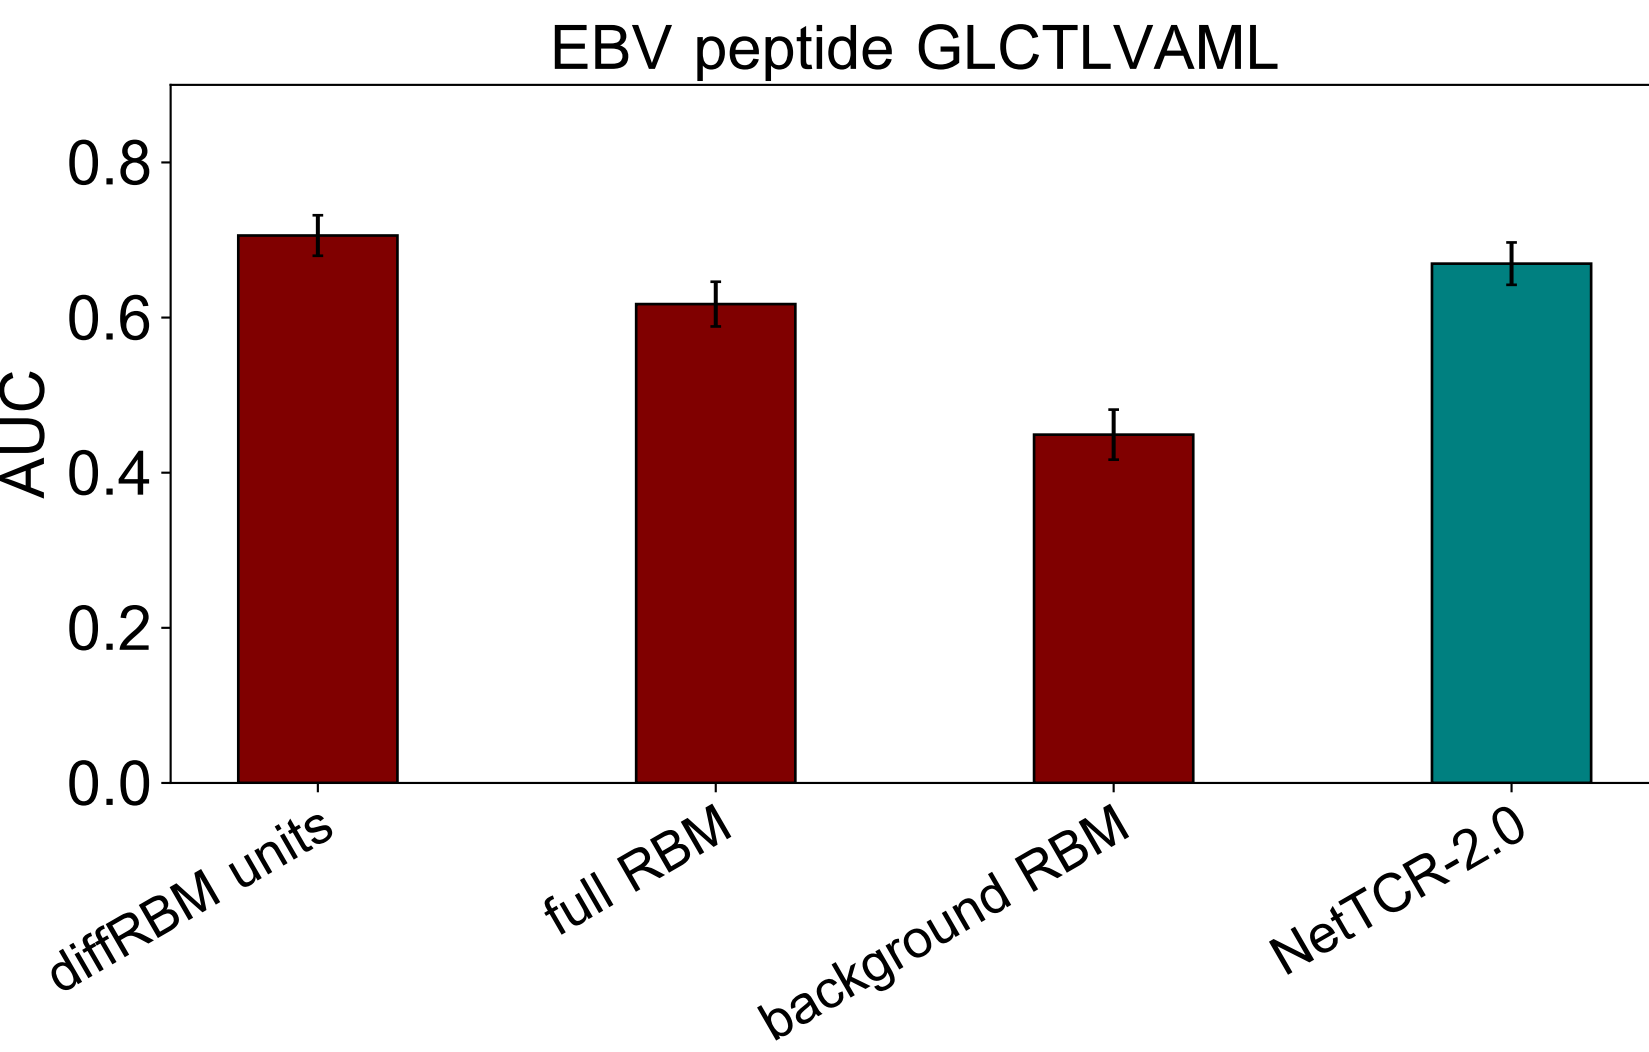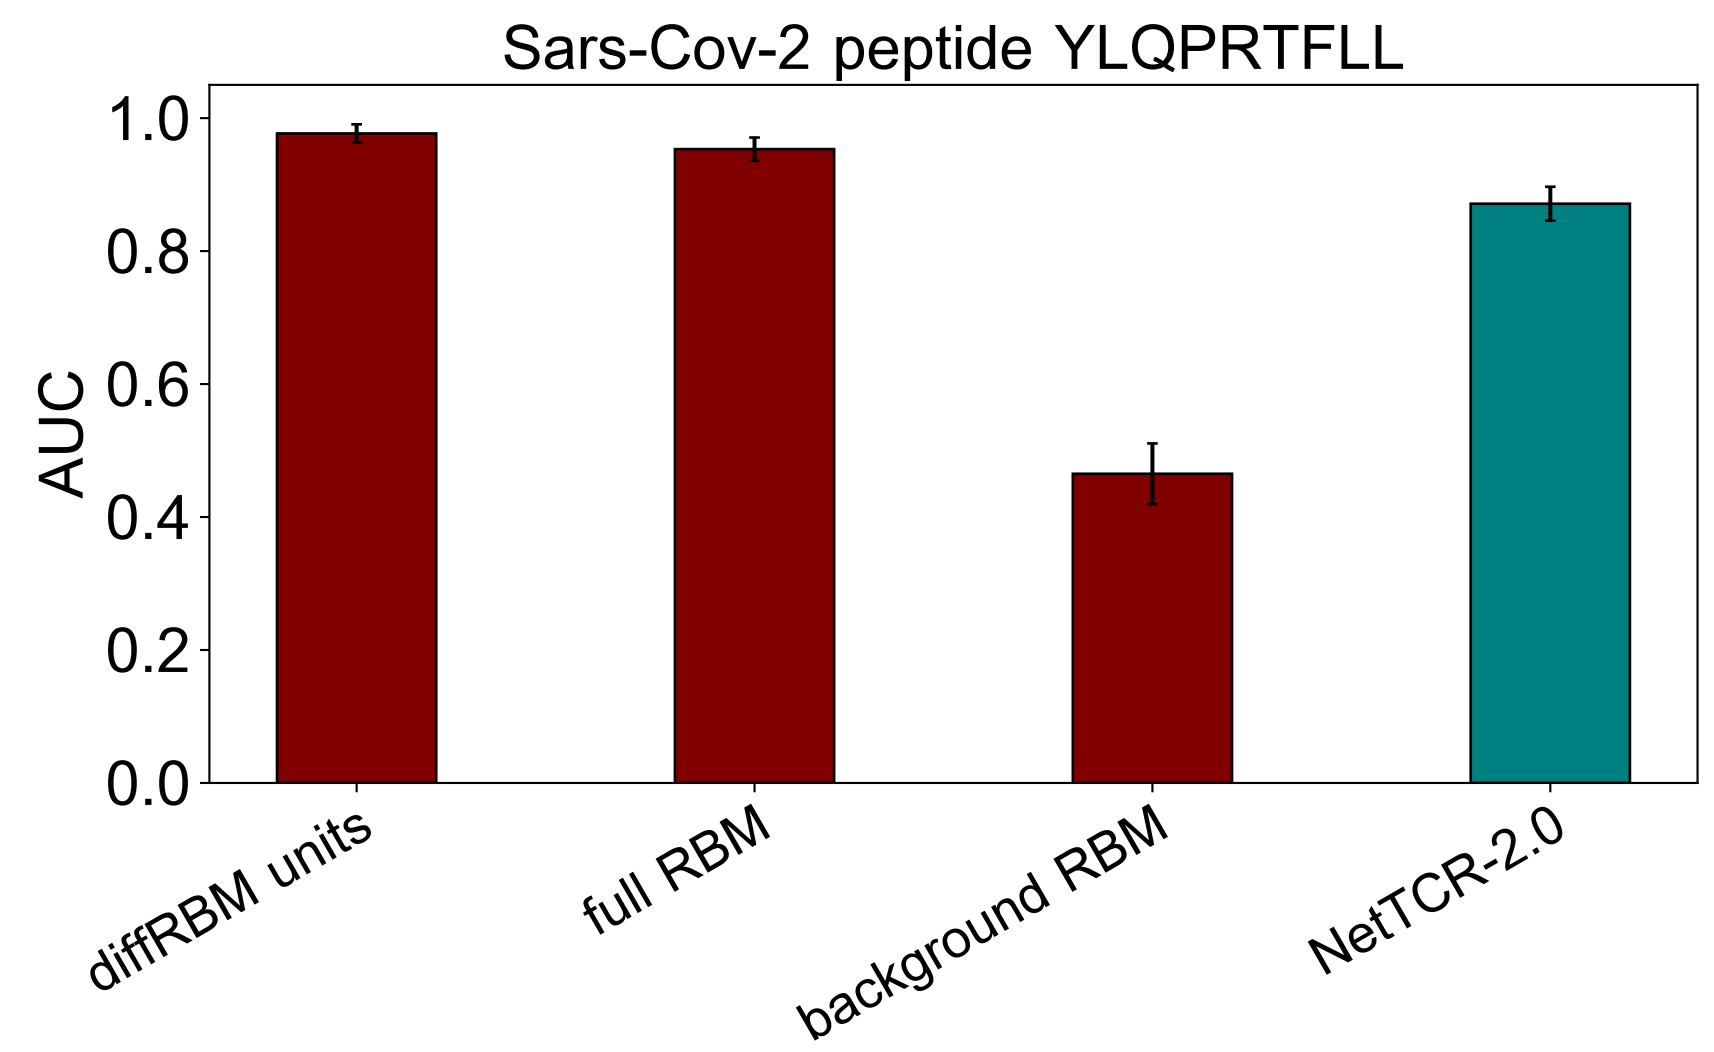

Supplement: supp [file elife_poa_e85126_Figure_6_figure_supplement_4.pdf › elife_poa_e85126_Figure_6_figure_supplement_4.pdf]
